# Supplementary material
Source: PubMed Central journal article supplement (PMC8390961)
Supplement: mmc2.pdf [file mmc2.pdf]

# Fluorescence intensity fluctuation analysis of receptor oligomerization in membrane domains

Gabriel Biener,<sup>1</sup> Michael R. Stoneman,<sup>1</sup> and Valerică Raicu<sup>1,2,\*</sup>

<sup>1</sup>Physics Department and <sup>2</sup>Department of Biological Sciences, University of Wisconsin–Milwaukee, Milwaukee, Wisconsin

**ABSTRACT** Fluorescence micrographs of the plasma membrane of cells expressing fluorescently labeled G protein-coupled receptors (GPCRs) often exhibit small clusters of pixels (or puncta) with intensities that are higher than those of the surrounding pixels. Although studies of GPCR interactions in uniform membrane areas abound, understanding the details of the GPCR interactions within such puncta as well as the nature of the membrane formations underlying the puncta is hampered by the lack of adequate experimental techniques. Here, we introduce an enhancement of a recently developed method termed fluorescence intensity fluctuation spectrometry, which permits analysis of protein-protein interactions within the puncta in live cell membranes. We applied the novel fluorescence intensity fluctuation data analysis protocol to previously published data from cells expressing human secretin receptors and determined that the oligomer size increases with receptor concentration and duration of treatment with cognate ligand, not only within uniform regions of the membrane (in agreement with previous publications) but also within the puncta. In addition, we found that the number density and fractional area of the puncta increased after treatment with ligand. This method could be applied for probing the evolution in the time of the chain of events that begins with ligand binding and continues with coated pits formation and receptor internalization for other GPCRs and, indeed, other membrane receptors in living cells.

**SIGNIFICANCE** Recent introduction of the fluorescence intensity fluctuation spectrometry has helped reveal protein-protein interactions in live cells using fluorescence images. Recent studies have targeted mostly flat plasma membrane portions or homogeneous protein solutions. In this article, we significantly expand fluorescence intensity fluctuation spectrometry to study inhomogeneous regions on the cell membrane appearing as brighter spots or puncta within the larger homogeneous regions of the membrane. We believe that this method provides new insights into the receptor dynamics inside membrane microdomains (puncta) and will eventually allow one to determine the microdomains identity when used in conjunction with specific biochemical assays.

## INTRODUCTION

A considerable number of G protein-coupled receptors (GPCR) are known to bind either to receptors of their own kind to form homo-oligomers or to different receptors to form hetero-oligomers. Although the relationship between the size of the oligomer and its biological function remains elusive (1–4), detailed computer simulations (5,6) as well as recent advancements in imaging technology (7–10) have provided evidence that the oligomeric size of GPCRs is modulated by interactions with ligands; this may eventually allow the long-awaited promise of using protein-protein interactions as drug targets to be realized in practice (11). Nevertheless, many open questions remain regarding the na-

ture of such interactions as well as their physiological relevance, mostly because of experimental challenges caused, among other things, by the heterogeneous structure of cell membranes, including the existence and the dynamic character of membrane folds, invaginations, docked vesicles, and other inhomogeneities.

Several methods have been developed over the past three decades for quantifying membrane-receptor interactions. From this arsenal of techniques, methods based on the collection and analysis of fluorescent signals from fluorescently labeled proteins of interest remain at the forefront for quantifying protein-protein interactions in living cells. The family of fluorescence-based methods can itself be broken down into a number of different approaches—e.g., fluorescence lifetime imaging (12), Förster resonance energy transfer (FRET) (13–17), fluorescence polarization anisotropy (18), and fluorescence fluctuation spectroscopy (FFS) (7,8,19–24)—each providing its own set of benefits

Submitted March 11, 2021, and accepted for publication June 11, 2021.

\*Correspondence: [vraicu@uwm.edu](mailto:vraicu@uwm.edu)

Editor: Baron Chanda.

<https://doi.org/10.1016/j.bpj.2021.06.015>

© 2021 Biophysical Society.

and drawbacks and differing in the type, extent, and precision of the information provided. Among these methods, those employing FFS to measure molecular brightness have proven to be of significant value for the specific task of probing the existence of an interaction between proteins as they are relatively straightforward to implement.

In the FFS family of methods, the molecular (or molecular complex) brightness is proportional to the product of the molecule's absorption cross section and quantum yield, which are both intrinsic properties of the fluorescent tag, as well as the number of molecules comprising the oligomer, i.e., the oligomer size. Earlier FFS-based methods provided the average oligomer brightness and an average number of oligomeric structures for an ensemble of molecules measured from either temporal fluctuations in fluorescence intensity, as in the case of the number and brightness analysis (21,25), or fluctuations in fluorescence intensities among pixels within an image, as in the case of spatial intensity distribution analysis (22–24). These analysis methods work best if the region of interest (ROI) is predominantly populated by an oligomer of only a single size. However, when the ROI contains a mixture of oligomers with different sizes or the relative proportions of the various oligomers vary as a function of, e.g., receptor concentration, only an average oligomer size is obtained. Such an outcome does not provide a complete picture of the dependence of the protein-protein interactions on the receptor concentration. Use of the traditional FFS-based approaches becomes even more challenging when comparing receptors treated with a ligand to untreated receptors, as ligand treatment might result in changes that may go undetected when extracting an average oligomer size over a broad receptor concentration range. In addition, one needs to carefully choose ROIs with homogeneous distributions of intensities or else the combination of fluorescence intensities from homogeneous regions with the comparatively high intensities from membrane inhomogeneities included in the same ROI would result in broad intensity distributions that would be mistaken for drastically increased average oligomer size.

The difficulties mentioned in the previous paragraph have been addressed by the recent introduction of an improved FFS method named fluorescence intensity fluctuation (FIF) spectrometry. This method provides quantitative information on the size and stability of oligomers as a function of protomer concentration (7) and presents an inherent inhomogeneity-filtering property (8). Moreover, if the analyzed set of ROIs contains a mixture of oligomers with different sizes, FIF spectrometry can predict the abundances of the various oligomers comprising the mixture as a function of protomer concentration.

FIF spectrometry is implemented in four steps, as follows: 1) large ROIs within fluorescence images of cells expressing fluorescently labeled molecules of interest are divided into smaller segments with a preset area using a computer algorithm. 2) Intensity distributions, generated

from pixel-level intensity values for each ROI segment, are fit with a Gaussian function, and the mean and variance of the fitted Gaussian are used to calculate an effective molecular brightness,  $\epsilon_{eff}$ , and a concentration,  $C_m$ , value for each segment. 3) Histograms of  $\epsilon_{eff}$ , also termed “brightness spectra,” are compiled from the  $\epsilon_{eff}$  values of individual segments and are sorted according to user-selected concentration ranges. 4) The  $\epsilon_{eff}$  spectra sorted according to their concentration ranges may be either visually assessed or mathematically deconvoluted using a monomeric brightness spectrum determined a priori to quantify the abundance of differently sized oligomeric species. Using FIF spectrometry, Stoneman et al. (7) determined that the human wild-type secretin receptor (hSecR) exists as a mixture of different oligomer sizes whose equilibrium may be shifted by receptor concentration or ligand binding, and Vu et al. (26) demonstrated that E-cadherin forms constitutive lateral (*cis*) dimers at the plasma membrane, whereas Ahmed et al. (27) showed that biased receptor tyrosine kinase ligands induce differential stabilization of receptor tyrosine kinase dimers.

Fluorescence micrographs of cellular membranes populated with fluorescently labeled receptors often contain small groups of pixels, which we call “puncta” herein, presenting intensity values that are significantly higher than the typical intensity level of pixels in the surrounding region. The large intensity fluctuations introduced by puncta (relative to uniform, low-intensity regions) generate artificially broad distributions of intensities within an ROI segment and hence artificially high brightness values. Earlier intensity fluctuation-based methods removed this artifact by painstakingly avoiding such high-intensity puncta or other inhomogeneities during the ROI-generation process. This method is rather tedious and imprecise, especially because for many receptors treated with ligands, the plasma membrane acquires an obvious “punctate” look. Apart from being imprecise, defining what is meant by uniform region is a very subjective act, which may result in inadvertently avoiding fluctuations resulting from the diffusion of molecules, which are the very fluctuations that are required to calculate the brightness.

The challenge of objectively analyzing fluorescence images containing puncta is easily circumvented in FIF spectrometry because of this method's inherent low-pass filtering capability, which stems from the following (8): 1) fitting the intensity histograms with a Gaussian, as opposed to taking the mean of the distribution, reduces the effect of the high-intensity tail contribution of the puncta to the calculated mean and variance for the ROI segment analyzed. 2) Dividing large ROIs into smaller segments (of which a punctum now represents a significant portion) pushes the calculated brightness of segments that contain puncta to the far right of the brightness distribution, which is cropped at reasonable values of a few times the brightness of a monomer. In a recent publication from our lab (8), the fluorescence images were analyzed using FIF spectrometry

before and after removing the fluorescent puncta from the images, and the results in both cases were comparable. This finding demonstrated the robustness of FIF spectrometry, even when applied to analysis of fluorescence images containing clear high-intensity puncta littered throughout the plasma membrane of imaged cells.

Nevertheless, in many situations, the high-intensity puncta appearing in the cell membrane micrographs are the actual objects of interest. High-intensity puncta that are visible within fluorescence images of cell membranes may represent a number of organized structures in the plasma membrane. Such membrane regions (also known as lipid microdomains) include endocytic vesicles, clathrin- or caveolin-coated pits, corrals (which are bordered by actin filaments, tubulin rod junctions and boundaries, or both), and rafts (28–42). Each of these microdomains have a molecular composition and supramolecular architecture that are different from the surrounding membrane areas. For example, rafts and caveolae (caveolin-coated pits/vesicles) contain more cholesterol than a typical membrane patch, whereas most pits and endocytic vesicles contain clathrin networks. Furthermore, each of the membrane domains have specific functionalities. For example, rafts were found to transport proteins along the apical membrane (30–32,37,41) or take part in endocytosis as caveolae (38–40), and pits await departure from the membrane via transformation into endocytic vesicles (28,31,33,42,43). Each of these domains will change the motion of proteins along the membrane and within the domain. For example, corrals (29,36) permit Brownian motion within its boundaries with a finite probability of proteins to hop in and out of the region, whereas clathrin networks and caveolae trap the proteins in the pit with a reduced ability to move within the pit and a small chance of leaving it (34,38,40–42).

The vast majority of studies investigating these different membrane domains have focused on the molecular makeup and specific role played by the domain as a whole in the overall function of the membrane. However, the interaction properties of the proteins confined within these domains are less often characterized (29,32). The focus of the work described herein is to modify the FIF spectrometry method to allow identification of the nature of the puncta and provide information on the size of the oligomers entering these puncta relative to those outside the puncta, both in the absence and presence of cognate ligand. We have introduced two new key elements into the analysis, as follows:

- 1) Before uniform segmentation of the membrane ROIs, the ROIs are subjected to the simple linear iterative clustering (SLIC) algorithm (44,45), which we have previously implemented to identify and remove puncta from the analysis of fluorescence micrographs (8). In this work, the fluorescence intensity recorded in the pixels located within the boundaries of the puncta are collected and analyzed separately.

- 2) As a single punctum is typically too small for reliable punctum-by-punctum analysis using FIF spectrometry, we combine the pixel content of a number of puncta with the same average intensity and calculate a single molecular brightness value from this cluster of puncta. The remaining steps follow the original FIF spectrometry procedure as described previously (7) and summarized above.

We tested this method using a set of previously obtained (7) fluorescence images of cells expressing hSecR labeled with mEGFP and observed that the size of the oligomer entering the puncta increases with receptor concentration and ligand treatment. This dependence is similar to that observed for uniform (i.e., depunctate) membrane patches. To determine whether the puncta were endocytic vesicles or pre-endocytic structures (i.e., pits) versus exocytic vesicles or entirely different structures, we have also computed the density of puncta per image as it changed with ligand treatment duration. We found that the density of the puncta increased with increasing ligand treatment duration. This observation suggests that the high-intensity puncta may represent pits that trap functional receptor oligomers and bud off into the cell, becoming endocytic vesicles (28,31,33,43), although additional assays are necessary to determine whether other membrane microdomains better explain this behavior.

## MATERIALS AND METHODS

### Source of data and outline of the methods of analysis

Fluorescence micrographs of the basolateral membrane of Chinese hamster ovary (CHO) cells expressing hSecR fused to monomeric enhanced green fluorescent protein (hSecR-mEGFP) and Flp-In T-REx 293 cells expressing either a monomeric (PM-1-mEGFP) or a tandem-dimer (PM-2-mEGFP) form of mEGFP anchored to the membrane were acquired previously (7) using a two-photon microscope and made available at [figshare: https://figshare.com/s/77b90d060901fa8b4cb3](https://figshare.com/s/77b90d060901fa8b4cb3). The analysis of the fluorescence images collected both in the absence and the presence of agonist ligand (secretin) was applied at three different levels: whole membrane, depunctate image, and clusters of puncta.

In the whole-membrane analysis, homogeneous and inhomogeneous sections of the basolateral portion of the membrane are not separated from one another; the only precaution has been to draw ROIs inside the cell contour to avoid analyzing portions of the membrane at the edge of the cell outline that are oriented parallel rather than perpendicular to the optical axis. Although whole-membrane analysis has already been applied to a subset of the fluorescence images analyzed in this study, (see Fig. 3 of Stoneman et al. (7)), we still included the results of applying it to the images analyzed in this work as a reference and because a wider range of receptor concentrations were included in the analysis herein.

In the depunctate image analysis, the fluorescence images are first subjected to a puncta identification and removal procedure (see Fig. 1), which is described in the next subsection. After applying the puncta-removal procedure, the images are then analyzed with FIF using the same steps as done in the whole-membrane analysis. The depunctate image analysis has also been applied previously to the same data as used in this study (8). However, two key changes have been made to the analysis procedure when compared

with the previous work: 1) more puncta have been removed in this work because of the fact that comparatively lower intensity puncta have been removed from the images (by lowering the threshold used in the SLIC procedure) when compared with the intensity of puncta that were removed in the previous work, and 2) a more efficient and rigorous puncta-removal procedure has been developed in this work.

In the clustered-puncta analysis, the high-intensity puncta that were removed in the depunctate image analysis approach are themselves analyzed to assess the most prevalent hSecR oligomer sizes occurring within the puncta. To generate large enough statistical ensembles of pixels, the puncta were sorted according to their individual average intensity values and assembled into clusters containing five puncta with similar average intensity, using a procedure that will be expanded upon below. Pixel-level intensity distributions were obtained from each cluster of puncta, and a  $C_m$  and a  $\epsilon_{eff}$  value were extracted for each cluster, which were further analyzed using the standard method of FIF (7). Specifically, the collection of  $C_m$  and  $\epsilon_{eff}$  values obtained from individual clusters were used to generate brightness spectrograms for various concentrations ranges; these spectrograms were then deconvoluted to determine the most prevalent oligomer sizes occurring within the puncta.

### Extraction of puncta using SLIC

An automated procedure for identification and removal of high-intensity puncta, i.e., contiguous groups of pixels with higher intensities than their surroundings, from fluorescence images using the SLIC algorithm was described previously (8). In this report, we refined that procedure to collect and further analyze the pixels located within those puncta to quantify the extent of the receptors' interactions located in the puncta. The main steps of the SLIC algorithm (44) for both identification and retention of the puncta from fluorescence images are listed in [Supporting materials and methods, note 2](#). The SLIC algorithm was modified in this article to improve the accuracy in identifying the puncta. The major modifications were as follows: 1) before applying the SLIC procedure, the fluorescence image was first smoothed using a Wiener filter. 2) The calculation of the distance between pixels and nearby segment center, which incorporates pixel intensity as part of the calculation, was changed to reflect the magnitude of the fluctuations in the segment/punctum and made sensitive to whether the pixel in test has a higher or lower intensity than the intensity of the center of the nearby segment. 3) The thresholding process in which segments are selected or rejected based on the value of their average intensity relative to the average intensity of a subset of the other pixels within the same ROI was adjusted to more accurately identify puncta in the images. In former publications, segments that had an average intensity that was further than three SDs away from the average intensity of the entire ROI were defined as punctum. However, in this work, we selected only the immediate surrounding pixels around the tested segment and calculated the average intensity of only the pixels within this surrounding area as a reference for the threshold process (as opposed to the entire ROI). Segments with a lower average intensity compared with the average intensity of the surrounding pixels plus one SD of the intensity of the surrounding pixels, i.e.,  $\langle I_{seg}^i \rangle < \langle I_{sur}^i \rangle + std(I_{sur}^i)$ , were classified as a punctum for the purpose of subsequent analysis steps.

### Concatenating pixel-level intensities of individual puncta into a single cluster of puncta

We determined that the fitting of intensity distributions assembled from the intensity values from pixels of individual puncta was unreliable because of the limited number of pixels available (see [Figs. S3 and S4](#)). Therefore, we consolidated the lists of intensity values from pixels of five individual puncta into a single unified list of intensity values (see [Supporting materials and methods, note 3](#) for details on the algorithm), which we call a *cluster of puncta*. The puncta included in each cluster were selected based on their re-

ceptor concentration level and not their spatial proximity. This was done by sorting the puncta according to their receptor concentrations and then grouping together the pixels within the puncta that are close to each other in the sorted list. This concatenation protocol is implemented in steps four and five of the algorithm described in [Supporting materials and methods, note 3](#). Once the clusters of puncta are generated, intensity histograms are constructed from each cluster of puncta. In this article, we make the approximation that the individual puncta are small enough, and thus, any calculation of brightness within a punctum results from intensity fluctuations and not plasma membrane deformations/invaginations, which would change the parameter  $\gamma$  that depends on the local orientation of the membrane relative to the direction of the laser beam (8).

### Molecular brightness of monomeric and dimeric standards

To apply FIF spectrometry (7) to the analysis of fluorescence images of hSecR-mEGFP, we first needed to obtain effective brightness distributions from fluorescence images of cells expressing either monomeric (PM-1-mEGFP) or tandem-dimer (PM-2-mEGFP) forms of the fluorescent marker attached to the cell membrane (see [Source of data and outline of the methods of analysis](#)); these fluorescence images (reported in [Fig. S1 of \(7\)](#)) were acquired using the same instrument and acquisition settings as used to acquire fluorescence images of cells expressing mEGFP-labeled hSecR. PM-1-mEGFP and PM-2-mEGFP were targeted to the membrane by addition of a palmitoylation-myristoylation sequence, (Met)-Gly-Cys-Ile-Asn-Ser-Lys-Arg-Lys-Asp, to the amino terminus of the A206K mEGFP and the A206K mEGFP tandem dimer. Effective brightness distributions of the PM-1-mEGFP and PM-2-mEGFP were obtained from fluorescence images in which the puncta were first removed using SLIC (as described above and in [Supporting materials and methods, note 2](#) and demonstrated in [Fig. S1](#)). By fitting the effective brightness distributions of cells expressing either 1) PM-1-mEGFP, 2) PM-2-mEGFP, or 3) simultaneous fitting of both PM-1-mEGFP and PM-2-mEGFP with a sum of Gaussians in which the position of the maximum of the  $n$ th Gaussian is constrained to be  $n$  times that of the Gaussian with the lowest mean value (which we refer to as the monomeric Gaussian), we extracted the monomeric brightness distribution, i.e., the mean (or peak position) of the monomeric Gaussian,  $\epsilon_{eff}^{mono}$ , and the SD of the monomeric Gaussian,  $\sigma$ . The best-fit value of  $\epsilon_{eff}^{mono}$  is used for the calculation of the receptor concentration,  $C_m$ , within the segments or cluster of puncta that were collected from images of cells expressing the hSecR-mEGFP constructs. The monomeric distribution as well as the oligomeric distributions resulting from the process described above are also used for unmixing the  $\epsilon_{eff}$  distributions, or brightness spectrograms, which were assembled from the  $C_m$  and  $\epsilon_{eff}$  values

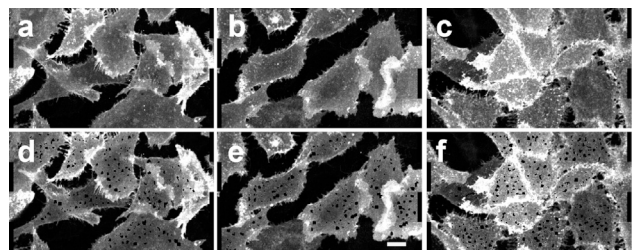

FIGURE 1 Typical fluorescence images of CHO cells expressing SecR-mEGFP untreated and treated with secretin, before and after puncta extraction. (a–c) Fluorescence images of the whole basolateral membranes of CHO cells before removal of puncta from the image. (d–f) Images of basolateral membranes of the cells after puncta were removed from the image. The cells were either untreated (a and d) or treated with secretin for 10 min (b and e) and 30 min (c and f). A 10- $\mu$ m scale bar is indicated by a white rectangle in (e).

extracted from the segments or clusters of puncta in hSecR-mEGFP-expressing cell images. The calculated  $\epsilon_{eff}^{mono}$  values were 60.7, 63.4, and 62.3 with  $\sigma$  of 27.9, 51.1, and 46.5 corresponding to cases (1), (2), and (3), respectively. A more detailed description of the procedure for obtaining  $\epsilon_{eff}^{mono}$  is provided in the [Supporting materials and methods, note 1](#). The various  $\epsilon_{eff}^{mono}$  values were utilized to determine the oligomer size abundance values along with estimating the error of those values by employing a bootstrapping procedure that is described in the next subsection.

## Calculating oligomeric abundances

Each brightness spectrogram may be decomposed to find the fraction of protomers within each of the different sized oligomer species (or the oligomer size fraction) relative to the total number of protomers in the sample. The process for the calculation of the oligomeric species fractions for different receptor concentration ranges using the bootstrapping procedure is performed in several steps, as follows:

- 1) Assemble all fluorescence images obtained from a particular sample into a single image stack (use the depunctate images for the depunctate image analysis).
- 2) Identify ROIs for all the images and then divide the ROIs into segments.
- 3) Calculate the brightness and receptor concentration values for each segment using step 2 from the FIF spectrometry procedure as described in the [Introduction](#) or in previous publications (7,8). For the receptor concentration calculation, use the  $\epsilon_{eff}^{mono}$  obtained from the simultaneous fitting of both PM-1-mEGFP and PM-2-mEGFP brightness distributions (see above subsection).
- 4) Assign each brightness and receptor concentration pair to the respective image frame it was extracted from.
- 5) Randomly choose X frames from the image stack and collect all the brightness and receptor concentration values from these frames into a list. As part of this random process, frames can be chosen by chance more than once or not chosen at all.
- 6) Construct brightness distributions for different receptor concentration ranges using the list from step 5.
- 7) Fit the brightness distributions using the oligomeric brightness distributions calculated in the above subsection with the  $\epsilon_{eff}^{mono}$  from step 3. The brightness distributions of the oligomers were of a Gaussian shape with a mean of  $n\epsilon_{eff}^{mono}$  for an oligomer of size n and the same SD,  $\sigma$ , as found when fitting the brightness standard.
- 8) Use the amplitudes from the fittings in step 7 to calculate the species fractions using the description of the data analysis program section in (7).
- 9) Repeat steps 5–8 300 times.
- 10) Repeat steps 3–9 for the other two  $\epsilon_{eff}^{mono}$  values obtained from cells expressing either PM-1-mEGFP or PM-2-mEGFP. When repeating step 3, only the receptor concentration is recalculated as the brightness values are not dependent on  $\epsilon_{eff}^{mono}$ .
- 11) Collect the 900 species fraction values for each oligomeric species and each receptor concentration range and calculate the average and SD values for each collection.
- 12) Plot the average species fraction as a function of receptor concentration using the values calculated in step 11. The error bars for each species fraction value in the plot represent the SD calculated in step 11. The species fraction versus receptor concentration plots are presented in [Figs. 2, 3, and S2](#).

The bootstrapping procedure as used in this article was reported earlier in Stoneman et al. (7). A modified version of the bootstrapping procedure was also applied to the clustered-puncta analysis method. The modification included an additional step between steps 5 and 6 in which we use the procedure described in the third subsection of [Materials and methods](#). Another difference between the depunctate image analysis and the clustered-puncta analysis is emphasized in step 3. Although for the depunctate image anal-

ysis, the segmentation procedure requires a simple grid-like division of each ROI into a square segment of a set size, for the clustered-puncta analysis, we performed the segmentation procedure described in the second subsection of [Materials and methods](#).

## Evaluating the goodness-of-fit between an intensity distribution and a single Gaussian function

To test whether a cluster of puncta is a more suitable entity for analysis than an individual punctum, we compared the quality of the fit of a Gaussian function to the intensity distributions obtained from punctum-by-punctum analysis (i.e., analyzing all the puncta in which each punctum is an individual entity) and clustered-puncta analysis (described above). To quantify the “goodness-of-fit” of a Gaussian function to an intensity distribution, we used a reduced  $\chi$ -square, which is calculated using the following expression:

$$\chi_r^2 = \left[ \sum_j \frac{(O_j - E_j)^2 \cdot B_j}{E_j} \right] / DOF, \quad (1)$$

where  $j$  is the index of the intensity bin along the histogram,  $O$  is the normalized measured intensity distribution,  $E$  is the representation of the Gaussian fit, and  $DOF$  stands for the degrees of freedom, defined as:

$$DOF = \left[ \sum_j B_j \right] - 3, \quad (2)$$

where  $B_j$  is 1 for  $E_j > 10^{-3}$  and 0 otherwise. We utilized the parameter  $B_j$  in the calculation of  $\chi_r^2$  to exclude intensity bins that were further than three times the SD from the mean of the histogram. This thresholding becomes necessary because of the presence of intensity bins that were far from the mean of the distribution but still registered a count of 1 or more (most likely because of the presence of noise or asymmetric distribution of intensities). At the same time, values of  $E_j$  far from the mean of the Gaussian are very small, and therefore, the  $\chi_r^2$  becomes artificially high because of the division by an extremely small value. The fitting of each intensity distribution was accomplished by adjusting the amplitude, mean, and SD of the single Gaussian fitting function to minimize  $\chi_r^2$ . The  $\chi_r^2$  values corresponding to the best fit of each individual punctum and cluster of puncta are displayed in the scatterplots of [Fig. S4](#).

## Calculation of average puncta density

To monitor possible changes in the population of puncta after ligand treatment, we computed for each sample the average puncta density per image area via the expression

$$D_{puncta} = \left\langle \frac{n_{puncta}^i}{A_{Image}^i} \right\rangle, \quad (3)$$

where  $n_{puncta}^i$  is the number of puncta within the  $i^{th}$  image,  $A_{Image}^i$  is the total image area in pixels (only pixels located within a defined ROI were counted toward the image area), and  $\langle \rangle$  signifies the average of the quantity it encloses. In addition, we computed the average fractional area of the puncta per image area using the expression

$$F_{puncta} = \left\langle \frac{A_{puncta}^i}{A_{Image}^i} \right\rangle, \quad (4)$$

where  $A_{puncta}^i$  is the total puncta area (in pixels) within an image.

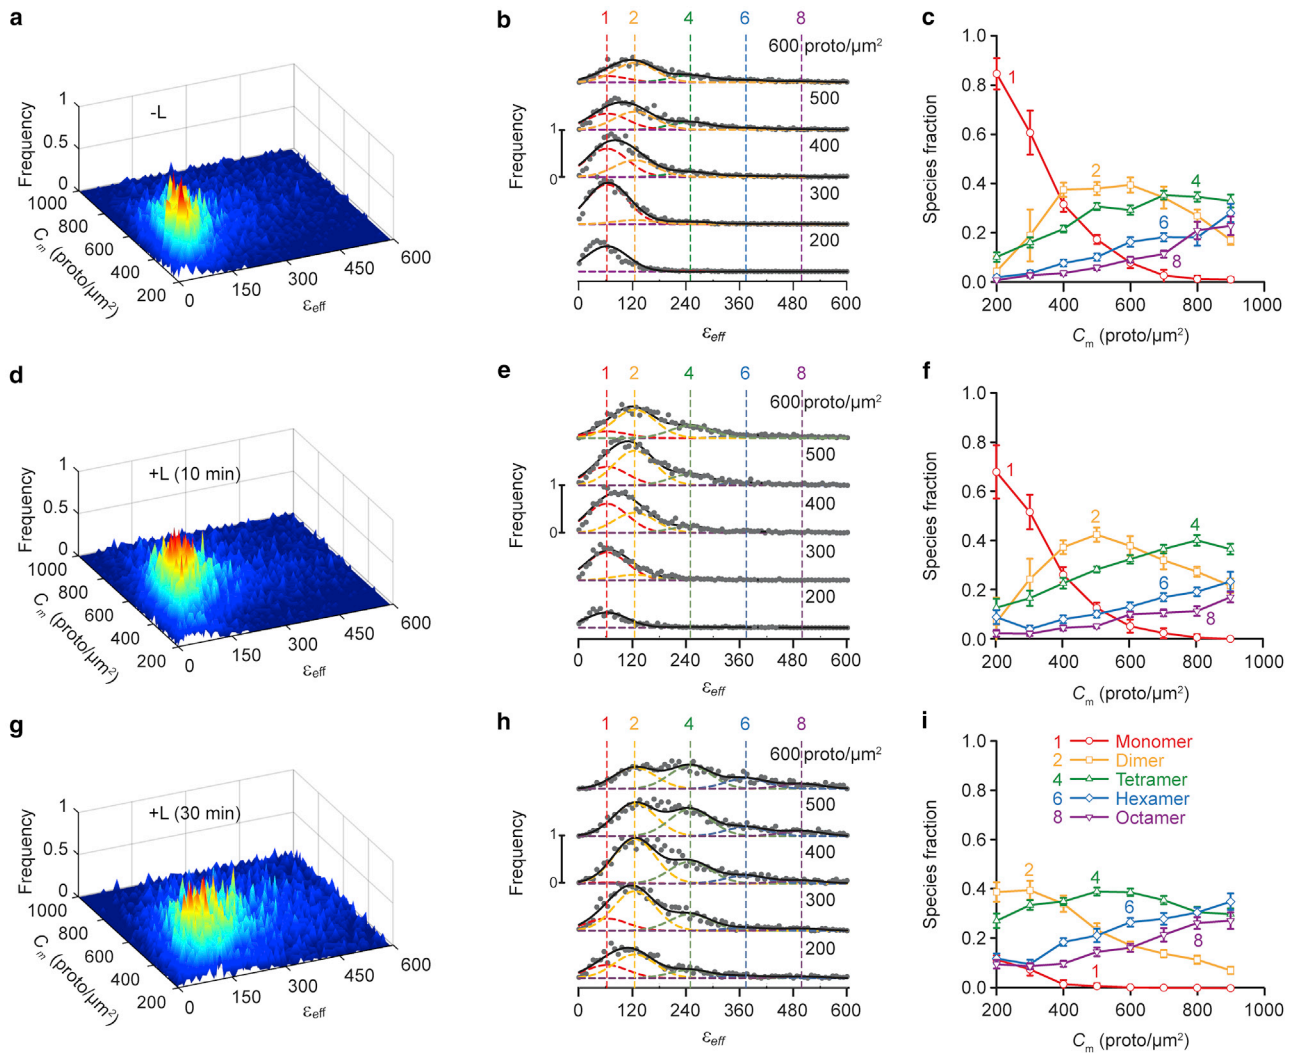

**FIGURE 2** FIF spectrometry analysis of basolateral membrane patches after excluding puncta (i.e., depunctate membrane analysis). Fluorescence images were obtained using two-photon excitation of cells expressing wild-type hSecR-mEGFP in the absence of agonist ligand (–L) (first row of graphs) or after 10- (second row of graphs) or 30-min (third row of graphs) treatment with 100 nM ligand (+L). (a, d, and g) Surface plots of the  $\epsilon_{eff}$  occurrence frequency versus receptor concentration of protomers using (a) 13,393, (d) 15,288, and (g) 12,964 total image segments. The maximal segment area was  $22 \times 22$  pixels<sup>2</sup>. Segment brightness and receptor concentration values were extracted from 82, 80, and 82 images, respectively, each of which contained several cells. (b, e, and h), Stacks of cross sections of surface plots in (a), (d), and (g), respectively, representing brightness distributions for different receptor concentration ranges. Middle range receptor concentration for each cross section (in protomers  $\times \mu\text{m}^{-2}$ ) is indicated above each curve. The vertical dashed lines indicate the peak positions for the brightness spectra of monomers ( $\epsilon_{despotted}^{mono} = 62.3$ ), dimers, and so on, obtained from the simultaneous fitting of the PM-1-mEGFP and PM-2-mEGFP spectrograms used as standards of brightness (Fig. S1). The images of the cells expressing the brightness standards were analyzed in the same manner, i.e., after removing puncta from the images. (c, f, and i) Relative concentration of protomers in each oligomeric species versus total concentration of protomers, as derived from the fitting of the curves in (b), (e), and (h), respectively, with the different Gaussian components representing different oligomeric species. Each data point and its error bar represent the mean  $\pm$  SD, respectively, of 900 different relative fraction values, obtained via a bootstrapping procedure described in (7) and in the [Materials and methods](#). To see this figure in color, go online.

The SD corresponding to  $D_{puncta}$  and  $F_{puncta}$  was also calculated to evaluate the significance of the changes in the two average quantities as a function of ligand treatment duration using a two-tailed Student's *t*-test analysis (see [Table 1](#)).

## RESULTS AND DISCUSSION

As described in detail in the [Introduction](#), FIF spectrometry relies on dividing ROIs containing flat portions of the mem-

brane into small segments to determine the brightness and concentration values corresponding to each segment from intensity fluctuations and assembling multiple such pairs of values (from thousands of ROI segments) into two-dimensional brightness and concentration histograms (or spectrograms). From these spectrograms and using reference brightness values (such as monomeric and dimeric or only monomeric brightness), information on oligomer size distribution within the sample is gleaned directly from the

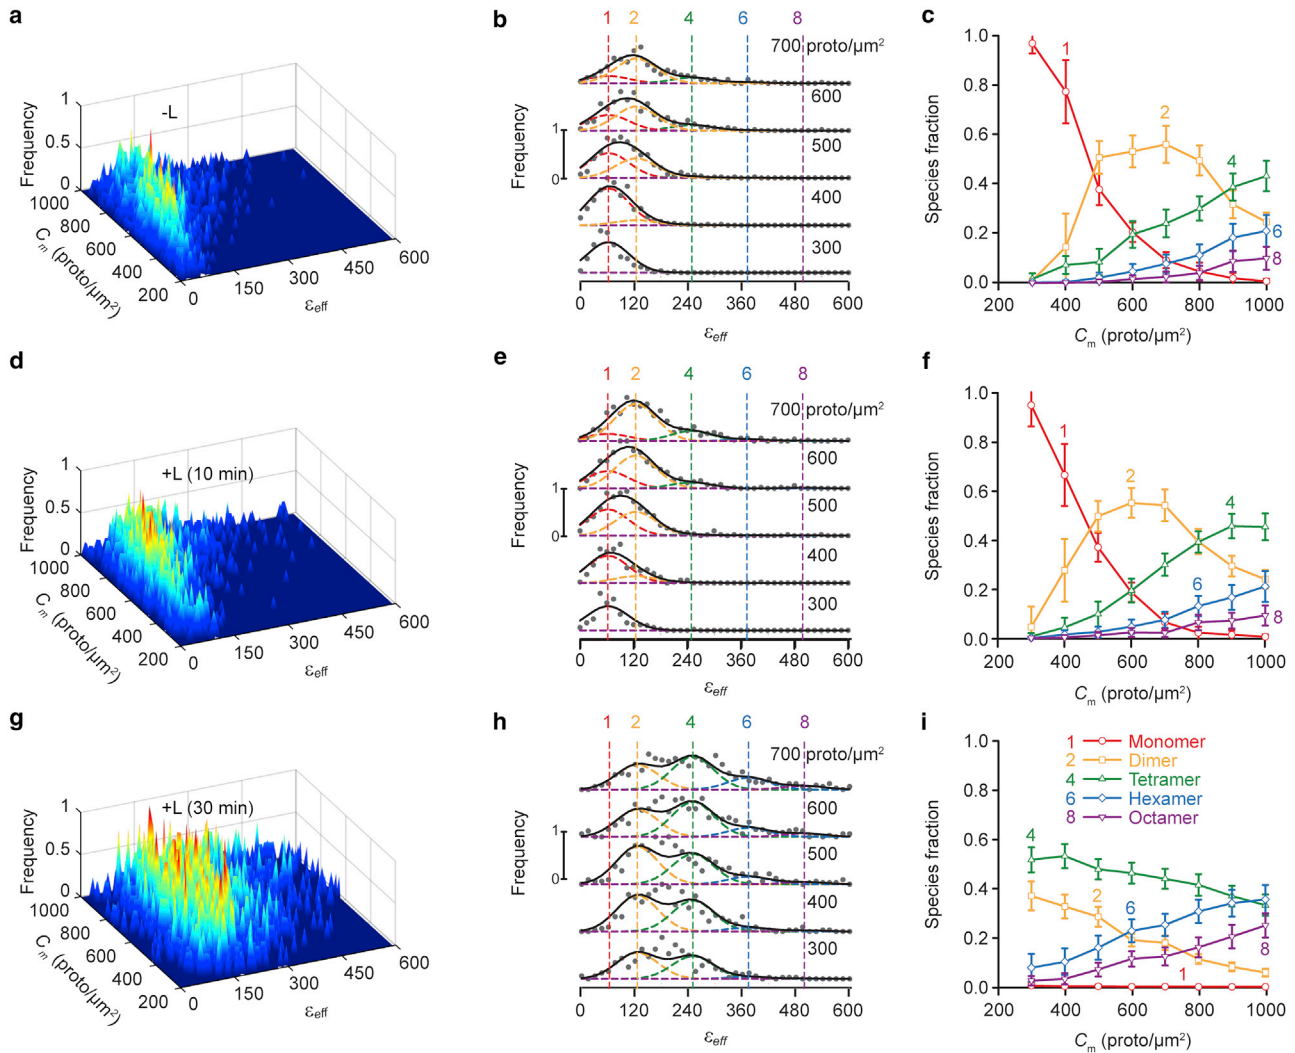

FIGURE 3 FIF spectrometry as applied to clusters of puncta extracted from fluorescence images of the basolateral membrane of cells expressing wild-type hSecR fused to mEGFP. The analysis was performed on the same images as in Fig. 2. (a, d, and g). Surface plots of the  $\epsilon_{eff}$  occurrence frequency versus receptor concentration of protomers using 3103 (a), 3677 (d), and 3704 (g) total puncta clusters. (b, e, and h) Stacks of cross sections taken from the surface plots in (a), (d), and (g), respectively. Middle range receptor concentration for each range (in protomers  $\times \mu\text{m}^{-2}$ ) is indicated above each curve (see explanation in Fig. 2). The vertical dashed lines indicate the peak positions for the brightness spectra of monomers ( $\epsilon_{eff}^{mono} = 62.3$ ), dimers, and so on (see Materials and methods). The monomeric brightness was extracted from the depunctate areas of the monomer and tandem-dimer standard samples (c, f, and i). Relative receptor concentration of protomers in each oligomeric species versus total receptor concentration of protomers, as derived from fitting of the curves in (b), (e), and (h), respectively, with a sum of different Gaussian components representing different oligomeric species. Each data point and its error bar represent the mean  $\pm$  SD, respectively, of 900 different relative fraction values, obtained from the statistical “bootstrapping” procedure mentioned in Fig. 2. To see this figure in color, go online.

spectrogram or extracted more precisely using quantitative analysis. The primary aim of this work is to extend the FIF spectrometry approach to include the analysis of receptor oligomerization within high-intensity puncta (or spots) that are routinely observed in fluorescence images of cell membranes harboring fluorescently labeled receptors and to compare its results to those obtained from uniform membrane regions, both in the presence and absence of receptor agonist. In addition, we assessed the density of such puncta before and after treatment with ligand to help identify their biological nature. An algorithm has been developed, as described in detail in the Materials and methods and Sup-

porting materials and methods, note 2, which identifies, extracts, and analyzes high-intensity fluorescence puncta using the SLIC method implemented previously (8). We applied this analysis method to a set of fluorescence images obtained from CHO cells expressing hSecR in the presence and absence of agonist ligand (secretin), as described below.

### Comparison between depunctate membrane and whole membrane

As a reference for subsequent analysis, we first quantified the oligomerization properties of the receptors in the relatively

**TABLE 1** Puncta density per image area

| Ligand Treatment                                                          | Number of Puncta per Image Area (Average $\pm$ SD) | Puncta Area per Image Area (Average $\pm$ SD) $\times$ pixel <sup>-1</sup> |
|---------------------------------------------------------------------------|----------------------------------------------------|----------------------------------------------------------------------------|
| S <sub>1</sub>                                                            | $(2.4 \pm 0.2) \times 10^{-3}$                     | $(0.120 \pm 0.009) \times \text{pixel}^{-1}$                               |
| S <sub>2</sub>                                                            | $(2.4 \pm 0.3) \times 10^{-3}$                     | $(0.120 \pm 0.010) \times \text{pixel}^{-1}$                               |
| S <sub>3</sub>                                                            | $(3.0 \pm 0.2) \times 10^{-3}$                     | $(0.150 \pm 0.015) \times \text{pixel}^{-1}$                               |
| S <sub>1</sub> versus S <sub>2</sub><br>t-statistic<br>(confidence level) | 1.94 (5.45%)                                       | 0.18 (85.8%)                                                               |
| S <sub>1</sub> versus S <sub>3</sub><br>t-statistic<br>(confidence level) | 17.12 (<0.01%)                                     | 14.27 (<0.01%)                                                             |

S<sub>1</sub>, no treatment; S<sub>2</sub>, 10-min treatment; S<sub>3</sub>, 30-min treatment.

uniform regions of the plasma membrane obtained after identification and extraction of the puncta from images. Typical fluorescence images of untreated and ligand-treated CHO cell membranes expressing hSecR-mEGFP before and after puncta extraction are presented in Fig. 1 for the visualization of the effectiveness of the algorithm for puncta identification and removal. Oligomerization of hSecR in such uniform regions has been investigated previously for lower receptor concentrations (between 180 and 600 protomers/ $\mu\text{m}^2$ ) relative to those of the receptors found within puncta (8); in this study, we extended our present analysis to higher receptor concentrations: up to 900 or even 1000 protomers/ $\mu\text{m}^2$ , depending on the availability of data. The results of the new analysis are shown in Fig. 2. As seen in Fig. 2 *c*, increasing the receptor concentration caused a reduction in the relative proportion of the monomeric to oligomeric species in the cell membrane. A similar trend was observed for cells treated with ligand for various lengths of time (see Fig. 2, *f* and *i*). In addition, cell treatment with ligand for 10 min (Fig. 2 *f*) reduced the relative proportion of monomers, whereas 30 min of treatment (Fig. 2 *i*) almost completely abolished the monomers, with tetramers becoming the most abundant oligomers. The results obtained for the narrower receptor concentration range of 200–600 protomers/ $\mu\text{m}^2$  agree well with the previously published results obtained using the same set of measurements (8). Including membrane regions with higher receptor concentrations allowed us to observe the formation of hexamers and octamers in higher abundances.

The oligomeric species content in depunctate images (Fig. 2) differed only slightly from those of the whole membrane (see Fig. S2), which confirms, once again, that FIF spectrometry has a built-in ability to filter out the puncta and any other strong inhomogeneity in the membrane, as shown in (8). This is a very significant advantage of basic FIF spectrometry (as introduced in previous publications (7,8)) when one is interested in oligomerization within homogeneous regions of membranes only.

## Extending the FIF method to investigate hSecR oligomerization in membrane puncta

It is often the case that the addition of ligand to cells harboring various receptors leads to the generation of additional punctate-looking features in the membrane (46–48). Herein, therefore, the puncta are the focus of our analysis. Because the number of pixels corresponding to typical individual puncta ( $\sim 50$  pixels per punctum vs.  $\sim 500$  pixels for segments of uniform membrane ROIs) are not large enough to generate statistical ensembles for accurately calculating molecular brightness and receptor concentration values (see Figs. S3 and S4), we grouped together puncta with similar average intensities to form clusters of five puncta (or  $\sim 250$  pixels), as described in the Materials and methods and Supporting materials and methods, note 3. In addition, because receptors are anchored to the membrane pit, making them immobile, intensity fluctuations corresponding to each punctum would be low, and this reduces one's ability to extract brightness and concentration information from a single punctum. Therefore, by clustering the puncta together, the intensity fluctuations among the puncta within the cluster can provide a more accurate brightness and concentration calculation and, thus, a more accurate molecular size estimation of the receptor oligomers. Note that the receptor concentration within the cluster of puncta needed to be approximately uniform; otherwise, the molecular brightness calculated for that cluster would reflect more the difference in concentration of the receptors from punctum to punctum within the cluster than the fluctuations in the intensity from pixel to pixel within a punctum. As shown in Figs. S3 and S4, a cluster of five puncta was large enough to provide a smooth intensity histogram and not too large to reduce the resulting number of brightness values (determined from each cluster) significantly. Further details regarding the comparison between the punctum-by-punctum and clustered-puncta analyses is provided in Figs. S3 and S4 as well as in Supporting materials and methods, note 4.

With a reliable procedure at hand for extracting the brightness and receptor concentration values from clusters of puncta, we set out to characterize the nature of the interactions within these structures. To calculate the receptor concentration, we have used the same  $\epsilon_{\text{eff}}^{\text{mono}}$  for the analysis of depunctate (i.e., uniform) membranes and the clusters of puncta. The results obtained from the analysis of the clusters of membrane puncta harboring hSecR are presented in Fig. 3. As seen, there is a common trend in the kinetic curves representing the species fraction versus receptor concentration plots obtained from the depunctate image analysis (Fig. 2), clustered-puncta analysis (Fig. 3), and whole-membrane analysis (Fig. S2); namely, the oligomer size increased both with receptor concentration and duration of treatment with ligand. However, the exact shape of the wire stack plots (Fig. 3, *b* and *e*) and the kinetic curves (Fig. 3, *c* and *f*) obtained from clustered-puncta analysis differed noticeably



from those of the depunctate image or whole-membrane analysis, in three main regards, as follows:

- 1) The wire stack plots shown in Fig. 3, *b* and *e* for the clustered puncta exhibit similar patterns as seen in the depunctate image and whole-membrane analyses; however, they appear to be shifted along the brightness axis toward the lower brightness values for each concentration range (compare to Fig. 2, *b* and *e* and Fig. S2, *b* and *e*). This shift may be artifactual and could originate from assuming that the puncta are as flat as the adjacent membrane area, which was implicit in our use of the same value for the geometrical factor,  $\gamma$ , for both types of analyses. The value of  $\gamma$  is calculated according to the following:

$$\gamma = \frac{\int \int_A PSF^4(x, y, z) dx dy dz}{\int \int_A PSF^2(x, y, z) dx dy dz}, \quad (5)$$

and is used in the calculation of effective brightness (see Eq. 6) and depends on the point spread function (PSF) of the instrument and its orientation relative to the membrane (20). If, however, a punctum in an image actually corresponds to an invagination (such as a coated pit (38,40)) in the membrane, which at least on its edges has a different orientation relative to the optical axis, one would need to use a different geometrical factor for computing the brightness of receptors within the punctum (pit).

To assess the effect of using an incorrect  $\gamma$ -factor value, we run Monte-Carlo simulations in which molecules were placed at random positions on a two-dimensional lattice and were illuminated with a Lorentzian-Gaussian-shaped laser beam. The intensity was collected for the entire lattice into a single detector. The simulations were repeated 500 times for each segment out of the 1000 segments simulated. The analysis of the brightness was performed using the following equation:

$$\epsilon_{eff} = \frac{\sigma^2 - \sigma_D^2}{\gamma \langle I_s \rangle}, \quad (6)$$

where  $\sigma_D^2$  is the variance of the intensity-dependent noise arising from the detector and can be calculated from separate measurements (see (7)), and  $I_s$  is the intensity collected for each simulation within a segment (detailed description of the simulation can be found in Supporting materials and methods, note 5). The results of the simulation (see Fig. S5) indicate that the shift of the brightness frequency curves for puncta (Fig. 3) relative to the depunctate membrane curves (Fig. 2) originate from the change in membrane orientation in the puncta, which would happen if the puncta are in fact small membrane invaginations (or coated pits). Note that a fully quantita-

tive test of this hypothesis would require an ability to model the gradual change in orientation of the membrane in a pit from mostly perpendicular to the beam propagation axis (i.e.,  $z$  axis) in the center of the pit parallel to the  $z$  axis at the edge of the pit, as is the case in a semispherical pit.

- 2) The plots of the species fraction versus receptor concentration for clustered puncta (Fig. 3, *c* and *f*) exhibit the same pattern as seen in the depunctate image (Fig. 2, *c* and *f*) and whole-membrane analyses (Fig. S2, *c* and *f*). However, they appear to be shifted toward higher receptor concentrations. That small shift may have the same underlying cause as mentioned under point (1). Although the concentration does not depend on  $\gamma$ , it does depend on the PSF intersection with the sample as it can be seen from the following equation for the concentration (7):

$$C = \frac{\langle I_s \rangle}{\epsilon_{eff}^{proto} \int \int PSF^2(x, y, z) dx dy dz}. \quad (7)$$

When the membrane containing the fluorescent molecules is oriented either perpendicular or parallel to the beam propagation axis, the PSF is integrated along  $x$  and  $y$  (or  $z$  for the parallel orientation), and the remaining coordinate ( $z$  for perpendicular and  $y$  for parallel) is assigned the value of 0. To demonstrate the effect on the brightness spectra as well as on the kinetic behavior of protein interactions when assuming different membrane orientations, we have recalculated the results shown in Fig. 3 using a modified integral in Eq. 7 along with a different  $\gamma$ -factor for recalculating the brightness (see Eq. 6). For that exercise, we assumed that, within the PSF, the membrane oriented perpendicular to the beam propagation axis occupies an area that is 10 times larger than the membrane oriented parallel to the beam axis. Even though the orientation of the membrane was assumed to be predominantly flat and perpendicular to the  $z$  axis, the addition of a small fraction of membrane oriented parallel to the beam propagation axis was sufficient to mimic the results shown in Fig. 2 for the depunctate images more closely (compare Fig. S6, *b*, *c*, *e*, and *f* to Fig. 2, *b*, *c*, *e*, and *f*). Thus, it is reasonable to assume that the shift in the brightness histograms presented in Fig. 3, *b* and *e* may result from the curvature of the puncta, which suggests that they may represent coated pits. The same is true for the shift in concentration as emphasized in Fig. 3, *c* and *f*.

- 3) The species fraction versus concentration plots for each of the different oligomeric sizes seems to reach higher values for clusters of puncta as compared to depunctate membrane areas (compare Figs. 2, *c*, *f*, and *i* and 3, *c*, *f*, and *i*). For example, for receptor concentrations between 300 and 330 protomers/ $\mu\text{m}^2$ , the monomeric fraction was greater than 85% for the case of clusters of

puncta as opposed to below 85% for the depunctate membrane case within the range of 200–230 proto-mers/ $\mu\text{m}^2$  (The choice for the different receptor concentration ranges is explained in point (2) above). In addition, the dimeric fraction reached 55% at its peak for the case of clusters of puncta, although it barely reached 40% for depunctate membranes (compare Fig. 2, *c* and *f* to Fig. 3, *c* and *f*). Furthermore, the tetramers and other high-order oligomers displayed the same behavior as the monomers and dimers. Even after correcting the data for membrane orientation, a reduction in the amplitudes of the species fraction versus concentration peaks (Fig. S6, *c* and *f*) was still not seen. The remaining differences may stem from the fact that mostly associated receptors would be driven toward the pits, and thus, one detects mostly higher-order oligomers from the intensity distributions of the puncta (versus simply monomers). This is because the apparent size of the receptor oligomers within the puncta reflects mostly fluctuations in fluorescence intensities from punctum to punctum, which are determined by the size of the oligomers that enter the puncta. As for the oligomers within the puncta themselves, fluctuations in their fluorescence intensities must be comparatively low, if the oligomers are immobilized within the pit once incorporated into it. A more definite conclusion in this regard may not be reached based on intensity fluctuation analysis alone, and it might require an ability to probe interprotomeric distances within the coated pits, using, e.g., FRET.

### Determination of the average puncta area and density within the membrane

Having established the similarities between the receptor oligomerization kinetics within high-intensity puncta compared with the oligomerization kinetics within uniform portions of the membranes, we next wanted to assess whether these puncta were indeed coated pits (or endocytic vesicles) as opposed to exocytic vesicles. For that purpose, we quantified the average puncta density per image excluding the pixels outside of the ROIs (in pixels) as well as the average fractional area of the puncta within an image with the same exclusion. Both of these calculations are described in the [Calculation of average puncta density](#) section. Table 1 summarizes the results of the average puncta density, expressed as the number of puncta per image area as well as the average area of the puncta per image area. As can be seen, both of these densities were the same between untreated cells and cells treated with secretin for 10 min. However, when the cells were treated with secretin for 30 min, both the number of puncta per image area and the average area of the puncta per image area increased. To test the statistical significance of the differences seen in the average puncta density and average fractional area

of the puncta between untreated and treated cells, we performed a two-tailed Student's *t*-test with the null hypothesis that there is no difference between the two compared populations. The critical confidence level (i.e., critical *p*-value) for rejecting the null hypothesis that we have chosen is 1% (below which the null hypothesis is rejected). As it can be seen from Table 1, the differences in both the average number of puncta per image and the fractional area density between untreated and 30-min treated cells were statistically significant.

In the case of ligand-induced internalization, we expect the number of endocytic vesicles to increase, as demonstrated in the literature (46–48). For example, Liu et al. (46) investigated internalization of EDG-1 receptor fused to GFP treated with Sphingosin-1-Phosphate, Xia et al. (47) have examined the internalization of galanin R2 receptors, and Ward et al. (48) researched the internalization of orexin OX1 and cannabinoid CB1 receptors. Those studies demonstrated ligand-induced internalization by showing a decrease in the signal of the unbound receptors in the flat membrane regions and an increasing density of cytoplasmic vesicles as the ligand treatment duration increased. We have instead quantified the density of the puncta on the membrane itself, which is the location at which endocytic vesicles form, starting as coated pits.

The finding that the increase in the puncta densities suggests that they may correspond to a subpopulation of coated pits and endocytic vesicles that are still docked at the membrane before their internalization. This hypothesis implies that the puncta should present local curvature compared with the uniform membrane regions, which causes their corresponding  $\gamma$ -value to decrease (see above). This in turn leads to an apparent increase in both the concentration of receptors and the maximum of the oligomeric species fraction described in the previous section, which is consistent with the observations made under point (1) above. Nevertheless, as these are all indirect results, biochemical assays, including the use of endocytosis inhibitors (49), should be used to distinguish coated pits and endocytic vesicles from other membrane microdomains.

### CONCLUSIONS

Fluorescence images of the basolateral membrane of cells expressing fluorescently labeled GPCRs often present groups of pixels with intensities that are higher than those of surrounding pixels. Such puncta may be attributed to endocytic vesicles, pits, rafts, corals, or any other type of bounded membrane regions. Although the study of GPCR interactions within areas of the membrane that do not include, or simply ignore, these puncta has been extensive, the interaction properties of GPCRs within the puncta has remained relatively unexplored. In this report, we have introduced a method designed to enable the study of the interactions of GPCRs within the puncta. This method, which

we believe to be novel, is based on the original FIF spectrometry method (7) but incorporates a few essential modifications. The first modification is to utilize a SLIC procedure (8) to identify puncta within the images, but instead of simply discarding the information contained in the pixels within the puncta (as it was done previously), this information is retained and used for further analysis. The second modification to the FIF approach is grouping the puncta into clusters of pixels with similar average concentrations. The clustering of the puncta is a required step as individual puncta are typically too small, i.e., enclose too few pixels, and do not provide the needed statistical information. Once the clusters of puncta are generated, the analysis proceeds with the original FIF spectrometry (7) as applied on the segments used in the depunctate image and whole-membrane analysis.

We tested the modified FIF method using fluorescence microphotographs of cells expressing hSecR fused to mEGFP subjected to two-photon excitation. The same analysis may be done, of course, using single-photon microscopy, such as confocal microscopy. We have first confirmed that within the nonpunctate membrane regions, the hSecR oligomer size increases with an increase in receptor concentration as well as an increase in ligand treatment duration, in agreement with previously published reports covering a subset of the receptor concentration ranges studied here (7,8). Next, we have also confirmed that excluding the puncta from the fluorescence images (depunctate image analysis) did not change the relative proportions of the various oligomer sizes extracted from applying FIF spectrometry when compared with the whole-membrane analysis of the same images. Furthermore, we gauged the level of GPCR interactions within the extracted puncta and compared them to the level of interactions found in the depunctate patches of the membrane. We noted that the calculation of the brightness and receptor concentration is affected by the local curvature of the membrane at the level of the puncta, which when considered, provided mathematically more consistent results.

Because FIF, like any other intensity fluctuation technique, relies on diffusion and because the receptors within various membrane microdomains are likely to be immobile (34,38,40–42), the oligomers inside these microdomains could have any size (most likely larger than those in the outside, uniform membrane regions) but be unable to convey information on their size through FIFs. Our obtained values for the oligomer size inside the puncta must therefore characterize the size of the oligomers as they are being incorporated within the puncta and thus are added to those already present in there. Results of any technique relying on fluctuations of fluorescence intensities must be regarded with caution when applied to vesicles and pits. Unambiguous evaluation of the oligomer size within membrane pits and vesicles would require such an analysis to be complemented with, e.g., FRET spectrometry

analysis (50–52), as we have also suggested in a recent publication (53).

## SUPPORTING MATERIAL

Supporting material can be found online at <https://doi.org/10.1016/j.bpj.2021.06.015>.

## AUTHOR CONTRIBUTIONS

G.B. designed algorithms, wrote the computer program, and performed data analysis. M.R.S. participated in refining the concepts and analysis methods presented. V.R. conceived and designed the study and supervised the project. G.B., M.R.S., and V.R. wrote the manuscript.

## ACKNOWLEDGMENTS

This work was partly supported by grants from the National Science Foundation (grants PHY 1126386 and DBI 1919670) as well as the University of Wisconsin–Milwaukee Research Growth Initiative (101X396).

## REFERENCES

1. Milligan, G. 2006. G-protein-coupled receptor heterodimers: pharmacology, function and relevance to drug discovery. *Drug Discov. Today*. 11:541–549.
2. Meyer, B. H., J. M. Segura, ..., H. Vogel. 2006. FRET imaging reveals that functional neurokinin-1 receptors are monomeric and reside in membrane microdomains of live cells. *Proc. Natl. Acad. Sci. USA*. 103:2138–2143.
3. Maurel, D., L. Comps-Agrar, ..., J. P. Pin. 2008. Cell-surface protein-protein interaction analysis with time-resolved FRET and snap-tag technologies: application to GPCR oligomerization. *Nat. Methods*. 5:561–567.
4. Mishra, A. K., T. Mavlyutov, ..., V. Raicu. 2015. The sigma-1 receptors are present in monomeric and oligomeric forms in living cells in the presence and absence of ligands. *Biochem. J.* 466:263–271.
5. Lee, Y., S. Basith, and S. Choi. 2018. Recent advances in structure-based drug design targeting class A G protein-coupled receptors utilizing crystal structures and computational simulations. *J. Med. Chem.* 61:1–46.
6. Miao, Y., and J. A. McCammon. 2016. Graded activation and free energy landscapes of a muscarinic G-protein-coupled receptor. *Proc. Natl. Acad. Sci. USA*. 113:12162–12167.
7. Stoneman, M. R., G. Biener, ..., V. Raicu. 2019. A general method to quantify ligand-driven oligomerization from fluorescence-based images. *Nat. Methods*. 16:493–496.
8. Stoneman, M. R., G. Biener, and V. Raicu. 2020. Reply to: spatial heterogeneity in molecular brightness. *Nat. Methods*. 17:276–278.
9. Ward, R. J., J. D. Pediani, ..., G. Milligan. 2020. Chemokine receptor CXCR4 oligomerization is disrupted selectively by the antagonist ligand IT1t. *J. Biol. Chem.* 296:100139.
10. Paprocki, J., G. Biener, ..., V. Raicu. 2020. In-cell detection of conformational substates of a G protein-coupled receptor quaternary structure: modulation of substate probability by cognate ligand binding. *J. Phys. Chem. B*. 124:10062–10076.
11. George, S. R., B. F. O'Dowd, and S. P. Lee. 2002. G-protein-coupled receptor oligomerization and its potential for drug discovery. *Nat. Rev. Drug Discov.* 1:808–820.
12. Wallrabe, H., and A. Periasamy. 2005. Imaging protein molecules using FRET and FLIM microscopy. *Curr. Opin. Biotechnol.* 16:19–27.

13. Mishra, A. K., M. Gragg, ..., P. S.-H. Park. 2016. Quaternary structures of opsin in live cells revealed by FRET spectrometry. *Biochem. J.* 473:3819–3836.
14. Margineanu, A., J. J. Chan, ..., P. M. W. French. 2016. Corrigendum: screening for protein-protein interactions using Förster resonance energy transfer (FRET) and fluorescence lifetime imaging microscopy (FLIM). *Sci. Rep.* 6:33621.
15. Stoneman, M. R., J. D. Paprocki, ..., V. Raicu. 2017. Quaternary structure of the yeast pheromone receptor Ste2 in living cells. *Biochim. Biophys. Acta Biomembr.* 1859:1456–1464.
16. Stoneman, M. R., N. Raicu, ..., V. Raicu. 2020. Fluorescence-based methods for the study of protein-protein interactions modulated by ligand binding. *Curr. Pharm. Des.* 26:5668–5683.
17. King, C., M. Stoneman, ..., K. Hristova. 2016. Fully quantified spectral imaging reveals in vivo membrane protein interactions. *Integr. Biol.* 8:216–229.
18. Jameson, D. M., and J. A. Ross. 2010. Fluorescence polarization/anisotropy in diagnostics and imaging. *Chem. Rev.* 110:2685–2708.
19. Qian, H., and E. L. Elson. 1990. Distribution of molecular aggregation by analysis of fluctuation moments. *Proc. Natl. Acad. Sci. USA.* 87:5479–5483.
20. Chen, Y., J. D. Müller, ..., E. Gratton. 1999. The photon counting histogram in fluorescence fluctuation spectroscopy. *Biophys. J.* 77:553–567.
21. Digman, M. A., R. Dalal, ..., E. Gratton. 2008. Mapping the number of molecules and brightness in the laser scanning microscope. *Biophys. J.* 94:2320–2332.
22. Godin, A. G., S. Costantino, ..., P. W. Wiseman. 2011. Revealing protein oligomerization and densities in situ using spatial intensity distribution analysis. *Proc. Natl. Acad. Sci. USA.* 108:7010–7015.
23. Ojosnegros, S., F. Cutral, ..., S. E. Fraser. 2017. Eph-ephrin signaling modulated by polymerization and condensation of receptors. *Proc. Natl. Acad. Sci. USA.* 114:13188–13193.
24. Pediani, J. D., R. J. Ward, ..., G. Milligan. 2018. Spatial intensity distribution analysis: studies of G protein-coupled receptor oligomerisation. *Trends Pharmacol. Sci.* 39:175–186.
25. Paul, M. D., R. Rainwater, ..., K. Hristova. 2021. Probing membrane protein association using concentration-dependent number and brightness. *Angew. Chem. Int.Engl.* 60:6503–6508.
26. Vu, V., T. Light, ..., D. Leckband. 2021. P120 catenin potentiates constitutive E-cadherin dimerization at the plasma membrane and regulates trans binding. *Curr. Biol.* S0960-9822:00608-4.
27. Ahmed, F., E. Zapata-Mercado, ..., K. Hristova. 2021. The biased ligands NGF and NT-3 differentially stabilize trk-A dimers. *Biophys. J.* 120:55–63.
28. Goldstein, J. L., R. G. Anderson, and M. S. Brown. 1979. Coated pits, coated vesicles, and receptor-mediated endocytosis. *Nature.* 279:679–685.
29. Saxton, M. J. 1995. Single-particle tracking: effects of corrals. *Biophys. J.* 69:389–398.
30. Simons, K., and E. Ikonen. 1997. Functional rafts in cell membranes. *Nature.* 387:569–572.
31. Ehrlich, M., W. Boll, ..., T. Kirchhausen. 2004. Endocytosis by random initiation and stabilization of clathrin-coated pits. *Cell.* 118:591–605.
32. Wawrzyniec, L., H. Rigneault, ..., P. F. Lenne. 2005. Fluorescence correlation spectroscopy diffusion laws to probe the submicron cell membrane organization. *Biophys. J.* 89:4029–4042.
33. Hanyaloglu, A. C., and M. von Zastrow. 2008. Regulation of GPCRs by endocytic membrane trafficking and its potential implications. *Annu. Rev. Pharmacol. Toxicol.* 48:537–568.
34. Yoshida, A., N. Sakai, ..., S. H. Yoshimura. 2018. Morphological changes of plasma membrane and protein assembly during clathrin-mediated endocytosis. *PLoS Biol.* 16:e2004786.
35. Yanagawa, M., M. Hiroshima, ..., Y. Sako. 2018. Single-molecule diffusion-based estimation of ligand effects on G protein-coupled receptors. *Sci. Signal.* 11:eaao1917.
36. Lee, S., H. Y. Tan, ..., P. D. Calvert. 2018. Actin filaments partition primary cilia membranes into distinct fluid corrals. *J. Cell Biol.* 217:2831–2849.
37. Kusumi, A., H. Ike, ..., T. Fujiwara. 2005. Single-molecule tracking of membrane molecules: plasma membrane compartmentalization and dynamic assembly of raft-philic signaling molecules. *Semin. Immunol.* 17:3–21.
38. Pelkmans, L., and A. Helenius. 2002. Endocytosis via caveolae. *Traffic.* 3:311–320.
39. Walker, J. K., R. T. Premont, ..., M. A. Shetzline. 1999. Properties of secretin receptor internalization differ from those of the beta(2)-adrenergic receptor. *J. Biol. Chem.* 274:31515–31523.
40. Bian, J., S. Zhang, ..., H. Liu. 2018. The mechanisms behind decreased internalization of angiotensin II type 1 receptor. *Vascul. Pharmacol.* 103–105:1–7.
41. Ianoul, A., D. D. Grant, ..., J. P. Pezacki. 2005. Imaging nanometer domains of beta-adrenergic receptor complexes on the surface of cardiac myocytes. *Nat. Chem. Biol.* 1:196–202.
42. Cézanne, L., S. Lecat, ..., A. Lopez. 2004. Dynamic confinement of NK2 receptors in the plasma membrane. Improved FRAP analysis and biological relevance. *J. Biol. Chem.* 279:45057–45067.
43. Pearce, B. M. 1988. Receptors compete for adaptors found in plasma membrane coated pits. *EMBO J.* 7:3331–3336.
44. Achanta, R., A. Shaji, ..., S. Süssstrunk. 2012. SLIC superpixels compared to state-of-the-art superpixel methods. *IEEE Trans. Pattern Anal. Mach. Intell.* 34:2274–2282.
45. Achanta, R., A. Shaji, S. Süssstrunk, ..., 2010. SLIC superpixels. *EPFL Technical Report.* 149300:1–15.
46. Liu, C. H., S. Thangada, ..., T. Hla. 1999. Ligand-induced trafficking of the sphingosine-1-phosphate receptor EDG-1. *Mol. Biol. Cell.* 10:1179–1190.
47. Xia, S., S. Kjaer, ..., Z.-Q. D. Xu. 2004. Visualization of a functionally enhanced GFP-tagged galanin R2 receptor in PC12 cells: constitutive and ligand-induced internalization. *Proc. Natl. Acad. Sci. USA.* 101:15207–15212.
48. Ward, R. J., J. D. Pediani, and G. Milligan. 2011. Ligand-induced internalization of the orexin OX(1) and cannabinoid CB(1) receptors assessed via N-terminal SNAP and CLIP-tagging. *Br. J. Pharmacol.* 162:1439–1452.
49. Dejonghe, W., I. Sharma, ..., E. Russinova. 2019. Disruption of endocytosis through chemical inhibition of clathrin heavy chain function. *Nat. Chem. Biol.* 15:641–649.
50. Raicu, V., M. R. Stoneman, ..., D. K. Saldin. 2009. Determination of supramolecular structure and spatial distribution of protein complexes in living cells. *Nat. Photonics.* 3:107–113.
51. Raicu, V. 2018. Extraction of information on macromolecular interactions from fluorescence micro-spectroscopy measurements in the presence and absence of FRET. *Spectrochim. Acta A Mol. Biomol. Spectrosc.* 199:340–348.
52. Raicu, V. 2019. Ab initio derivation of the FRET equations resolves old puzzles and suggests measurement strategies. *Biophys. J.* 116:1313–1327.
53. Stoneman, M. R., G. Biener, and V. Raicu. 2020. Proposal for simultaneous analysis of fluorescence intensity fluctuations and resonance energy transfer (IFRET) measurements. *Methods Appl. Fluoresc.* 8:035011.

**Biophysical Journal, Volume 120**

**Supplemental information**

**Fluorescence intensity fluctuation analysis of receptor oligomerization  
in membrane domains**

**Gabriel Biener, Michael R. Stoneman, and Valerică Raicu**

# Supporting Materials

## Fluorescence Intensity Fluctuation Analysis of Receptor Oligomerization in Membrane Domains

Gabriel Biener<sup>1</sup>, Michael R. Stoneman<sup>1</sup>, Valerică Raicu<sup>1,2</sup>

<sup>1</sup>Physics Department, University of Wisconsin – Milwaukee, Milwaukee, Wisconsin, USA

<sup>2</sup>Department of biological sciences, University of Wisconsin – Milwaukee, Milwaukee, Wisconsin, USA

### *Supplementary Note 1. - Determination of effective monomeric brightness from fluorescence images of cells expressing monomeric or dimeric fluorescence molecules*

The effective monomeric brightness,  $\varepsilon_{eff}^{mono}$ , distribution was determined using de-punctate fluorescence images of Flp-In<sup>TM</sup> T-REx<sup>TM</sup> 293 cells expressing either the monomeric (PM-1-mEGFP) or a tandem-dimer (PM-2-mEGFP) of the fluorescent marker. First, regions of interest (ROIs) were drawn on the fluorescence images demarcating only the basolateral portion of the membrane, and then these ROIs were divided into square segments; the maximum area of each of the segments was 484 pixels<sup>2</sup>. Next, we calculated the molecular brightness,  $\varepsilon_{eff}$ , and concentration,  $C_m$ , values for each segment and then assembled the brightness values into a brightness distribution curve; only brightness values, corresponding to segments with concentrations between 750 and 1600 protomers  $\times \mu\text{m}^{-2}$  were used to construct the brightness distribution. In order to calculate the fluorescent molecule concentration, we needed to input a value of  $\varepsilon_{eff}^{mono}$  (of which we were trying to determine), at this step. Therefore, in an intermediate step we used the previously published monomeric brightness of 64.8 (1) as a first guess. Finally, we fitted the brightness distribution with a sum of four Gaussians. The mean value of each of the Gaussians corresponded to the peak brightness value from a particular oligomer size (monomer, dimer, trimer, and tetramer for the PM-1-mEGFP sample and monomer, dimer, tetramer, and hexamer for PM-2-mEGFP sample) and were therefore set equal to  $n\varepsilon_{eff}^{mono}$  where  $n$  represents the size of the oligomer. The standard deviations,  $\sigma$ , of all the Gaussians were set equal to each other. The fitting was accomplished by minimizing the discrepancy between the measured data and the fitting curve. The minimization was obtained by applying an iterative fitting approach which utilized the Nelder-Mead method (2, 3). The parameters which were allowed to vary during the fitting process were  $\varepsilon_{eff}^{mono}$ ,  $\sigma$ , as well as the amplitudes of all the Gaussians.

We deconvoluted all brightness spectrograms obtained from hSecR expressing cells using three different monomeric brightness distributions. The three different monomeric brightness distributions were determined by applying the monomeric brightness determination process (described in the previous paragraph) to: (i) the fluorescence images of only the PM-1-mEGFP sample, (ii) only the PM-2-mEGFP sample, or (iii) both the PM-1-mEGFP sample and PM-2-mEGFP sample combined. The last value required simultaneous fitting of both distributions. Examples of the results from simultaneously fitting the brightness distributions of the PM-1-

mEGFP sample and PM-2-mEGFP sample are presented in supplementary Fig. S1 for the de-punctate fluorescence images.

***Supplementary Note 2. - Identification and separation of puncta from regions of interest***

The algorithm for identification and retention of the puncta from fluorescence images builds upon the previously published algorithm for puncta removal, with steps 1-2 and 10-18 added for improved identification of puncta as well as a modified thresholding procedure (steps 28-30) of puncta where for each punctum only the surrounding pixels are used to calculate a reference intensity.

1. Calculate Median Absolute Deviation (MAD) of the image's intensity values.
2. Smoothen the Image using Wiener filter with  $1.48 \times \text{MAD}$  as the standard deviation of the noise. The smooth image is used only to segment the ROIs in the SLIC procedure and does not affect the FIF analysis of the results.
3. Segment ROI into square segments of area  $l_s^2$  ( $l_s$  is the length of the square side in pixels)
4. Calculate center of mass for each segment; remove segments located outside of ROI.
5. Initiate a two-dimensional array, denoted as *Label-Matrix*, using the value 0 for each array element. The elements' positions in the *Label-Matrix* array are a one-to-one mapping of the pixels' positions of the fluorescence image currently analyzed.
6. Initiate a two-dimensional array, denoted as *Distance-Matrix*, using the value of infinity for each array element. The elements' positions in the *Distance-Matrix* array are a one-to-one mapping of the pixels' positions of the fluorescence image currently analyzed.
7. **While** difference between center of mass positions in step k and step k-1 is greater than threshold, do
8.     **For** each segment  $i$  centered at  $(x_i, y_i)$
9.         Crop a square window with area of  $4l_s^2$  centered at  $(x_i, y_i)$  and assemble the intensities from each pixel into a list of intensities  $I$
10.        Calculate intensity fluctuation contrast,  $C$ , by using  

$$C = (Q_{75}(I) - Q_{25}(I)) / \text{Median}(I)$$
 $Q_{75}$  and  $Q_{25}$  are the third and first quartile values of the signal's intensity list and Median is the median value of the same list.
11.        **If**  $C > 1$
12.           **If**  $I(x_j, y_j) > I(x_i, y_i)$ , where  $j$  is the index of a pixel within the signal's Intensity list.
13.            Intensity weight,  $m = \text{abs}(I - I(x_i, y_i))_{\text{Max}} / (2 \cdot r)$ , where  $r$  is an input ratio between climbing up and sliding down.
14.            **Else**  $m = \text{abs}(I - I(x_i, y_i))_{\text{Max}} / 2$
15.            **End if**
16.        **Else**  $r = 1$
17.        Repeat step 14

18. **End if**
19. Calculate distance between pixels enclosed within the square window area, using Eqs. 3 and 4 from (4) and  $m$  from steps 13 or 14.
20. **If** the distance calculated in step 19 is smaller than the distance recorded in  $Distance-Matrix(x_j, y_j)$ ,
21. Replace the distance value in the corresponding element with the new distance
22. Replace the segment index in the respective element in  $Label-Matrix$  with  $i$
23. **End If**
24. **End For**
25. Recalculate center of mass of each segment by averaging the x and y coordinate values of all the pixels that belong to the  $i^{th}$  segment
26. **End While**
27. Calculate average intensity,  $\langle I \rangle_i$ , for each segment resulting from steps 1-26. The position of the pixels belonging to segment  $i$  can be found from the  $Label-Matrix$  array by extracting the positions of the elements containing the value of  $i$
28. Replace each pixel within a segment with the segments average value. This Image is named Segmented Image.
29. For a given segment, find the average intensity of the surrounding segment,  $\langle I_{sur} \rangle$ , and calculate  $\langle I_{sur} \rangle + \|I_{sur}\|_2$ ,  $\langle I_{sur} \rangle$  and  $\|I_{sur}\|_2$  are the average and standard deviation of  $I_{sur}$ , respectively.
30. For each segment if  $\langle I \rangle_i < \langle I_{sur} \rangle + \|I_{sur}\|_2$ , remove segment from segment list.
31. Repeat 1-30 for all ROIs

***Supplementary Note 3. - Concatenating pixel content of multiple individual puncta into a single cluster of puncta***

We created a cluster of puncta by consolidating the lists of intensity values from pixels of multiple individual puncta into a single unified list of intensity values. Intensity histograms were constructed from each cluster of puncta. The full algorithm is provided below.

1. Extract individual puncta from fluorescence images using the SLIC based procedure described in supplementary note 2.
2. For each individual punctum calculate the average intensity from the list of intensity values of the individual punctum pixels.
3. Calculate the receptor concentration of each individual punctum using the punctum's average intensity and the extracted monomeric brightness.
4. Order the puncta according to receptor concentration, calculated in step 3, from lowest to highest.
5. Combine the intensity values of pixels from five sequential puncta, starting from the lowest receptor concentration (i.e., puncta 1 to 5 as ordered in step 4), to form a cluster of puncta. Repeat for each set of five sequential puncta (i.e. puncta 6-10, 11-15, etc.)



6. Create an intensity distribution from the pixels assigned to a cluster of puncta; repeat for all clusters.
7. Fit each intensity histogram, calculated in step 6, using a single Gaussian and extract mean, and standard deviation, of the fitting curve.
8. From each set of parameters extracted from step 7 along with the camera noise information using Eqs. 6 and 7 calculate the brightness,  $\varepsilon_{eff}$ , and receptor concentration,  $C_m$ .
9. Assemble a list of brightness values and receptor concentrations.
10. Continue with the FIF spectrometry analysis on the list assembled in step 9.

Even though it seems that step 3 is redundant it is useful for comparing receptor concentration values from this step with the one calculated in step 8. We expect these values to be roughly close to each other.

#### ***Supplementary Note 4. – Comparison between punctum-by-punctum analysis and clustered puncta analysis***

The intensity distributions for smaller areas are harder to fit with a Gaussian curve as we observed by comparing the quality of fit of typical intensity distribution curves obtained from clusters of puncta (supplementary Fig. S3 a, c, e) to that obtained from individual puncta (supplementary Fig. S3 b, d, f). We have quantified the differences between the quality of the fit of intensity histograms obtained from individual puncta and clusters of puncta, as follows. We first divided each intensity histogram by its maximum frequency, since the intensity histograms produced as part of the punctum-by-punctum analysis are characterized by a peak frequency value far lower than the one produced by a cluster of puncta; thus, the normalization procedure places both sets of histograms on an equal footing. Next, we fitted each normalized intensity distribution with a single Gaussian function and calculated the reduced  $\chi^2$  ( $\chi_r^2$ ) according to Eq. 1 (see Methods section). Finally, we assembled the  $\chi_r^2$  values from all the puncta or clusters of puncta into scatter plots, shown in supplementary Fig. S4. From supplementary Fig. S4, we notice that the scatter plot of  $\chi_r^2$  values obtained from the punctum-by-punctum analysis is broader and centered at a higher value when compared with the plot of  $\chi_r^2$  values obtained from the clustered puncta analysis; this higher center value and larger spread is an indication that the typical fitting of intensity distributions generated from individual puncta is poorer than that of clusters of puncta, and therefore provides a good reason not to use a punctum-by-punctum analysis. We calculated the spread of  $\chi_r^2$  for different bin sizes in order to avoid aliasing or any adverse effects that the choice of specific bin size has on the results. The broadening and increased y position of the scatter plot centroid for the punctum-by-punctum analysis, as compared with the clustered puncta analysis, was consistent for all the different bin sizes, as is evident in supplementary Fig. S4.

#### ***Supplementary Note 5. – Simulation of fluorescence intensities of molecules embedded in a two-dimensional lattice excited by a Lorentz-Gauss beam.***

In order to study the effect of using an incorrect  $\gamma$  factor when calculating brightness as described in **extending the FIF method to investigate hSecR oligomerization in membrane puncta** subsection in the main body, we have considered running Monte-Carlo simulations for an ensemble of molecules embedded in a two-dimensional lattice and generating a known brightness and concentration. These molecules are excited by a simulated laser beam with a Lorentz-Gauss shape and the emission from these molecules is collected by a simulated detector. We considered two different scenarios. The first scenario assumed a two-dimensional plane containing molecules placed perpendicular to the beam propagation axis, while the second assumed a plane oriented parallel to the beam propagation axis. In both cases the intensity was collected by a detector and the simulation was repeated 500 times. The 500 simulations for each case provided data for a single image segment. We have simulated 1000 segments for each scenario. The simulation algorithm is given below.

1. Select a preset molecular brightness,  $\epsilon_{eff}^{Proto}$ , and a preset average number of molecules per pixel,  $N$ .
2. Construct a 3D lattice.
3. Calculate the beam intensity at each lattice node, assuming the beam is focused at the center of the lattice box, i.e.,  $I_{LG}(x, y, z) = \frac{\omega_0^2}{\omega_z^2} e^{-2\left(\frac{x^2+y^2}{\omega_z^2}\right)}$ , where  $\omega_z^2 = \omega_0^2 \left[1 + \left(\frac{z}{z_R}\right)^2\right]$ ,  $z_R = \frac{\pi\omega_0^2}{\lambda}$ ,  $\omega_0$  is the beam waist, and  $\lambda$  is the beam wavelength.
4. **For** each Segment,  $i$
5.     **For** each pixel,  $j$ , within the segment  $i$
6.         Draw a number  $n_{ij}$  from a Poissonian distribution centered at  $N$  which symbolizes the number of molecules for pixel  $j$  in segment  $i$ .
7.         Randomly select coordinates for each molecule,  $k$ , within the lattice limiting the molecules to a 2D plane (with a normal parallel to  $y$  or  $z$ ).
8.         Calculate the emission from each molecule by multiplying the beam power with the molecular brightness, e.g.,  $I_{LG}^2(x_{ijk}, y_{ijk}, 0) \times \epsilon_{eff}^{Proto}$ .
9.         Sum up the emission from the entire lattice box, i.e.  $I_{ij} = \sum_{k=1}^{n_{ij}} I_{LG}^2(x_{ijk}, y_{ijk}, 0) \times \epsilon_{eff}^{Proto}$ .
10.     **End for**,  $j$
11. **End for**,  $i$

After simulating the intensities for all the pixels contained in each of the segments, we computed the brightness of a particular segment simply by using  $\epsilon_{eff}^i = \frac{var(I_{ij})}{\gamma \cdot \langle I_{ij} \rangle}$ . The last step was to plot the brightness histogram from all the segments. The  $\gamma$  factor used in the above equation can be chosen based on the assumed scenario, e.g., 0.5 for a plane perpendicular to the beam propagation axis and 0.377 for parallel to the beam propagation axis. The results from this simulation are shown in supplementary Fig. S5. Panel *a* illustrates the case where all the molecules are placed in a plane perpendicular to the beam propagation axis. Panels *b* and *c* illustrates the scenario of illuminating molecules embedded in a plane parallel to the beam propagation axis for two different  $\gamma$  values: using the correct  $\gamma$  value of 0.377 for a parallel orientation of the membrane (panel *c*), and using

the  $\gamma$  from the scenario corresponding to panel *a*, i.e., using an incorrect  $\gamma$  value of 0.5. As can be seen, the brightness histogram shifted (in supplementary Fig. S5 *b*) towards lower brightness values. This shift qualitatively agrees with the shift seen in Fig. 3, *b* and *e* and Fig. 2, *b* and *e*.

## SUPPORTING REFERENCES

1. Stoneman, M. R., G. Biener, R. J. Ward, J. D. Padiani, D. Badu, A. Eis, I. Popa, G. Milligan, and V. Raicu. 2019. A general method to quantify ligand-driven oligomerization from fluorescence-based images. *Nat. Methods*. 16:493-496, doi: 10.1038/s41592-019-0408-9.
2. Ward, R. J., J. D. Padiani, S. Marsango, R. Jolly, M. R. Stoneman, G. Biener, T. M. Handel, V. Raicu, and G. Milligan. 2020. Chemokine receptor CXCR4 oligomerization is disrupted selectively by the antagonist ligand IT1t. *J. Biol. Chem.*, doi: 10.1074/jbc.RA120.016612.
3. Stoneman, M. R., N. Raicu, G. Biener, and V. Raicu. 2021. Fluorescence-based Methods for the Study of Protein-Protein Interactions Modulated by Ligand Binding. *Curr. Pharm. Des.* in press, doi.
4. Achanta, R., A. Shaji, K. Smith, A. Lucchi, P. Fua, and S. Susstrunk. 2012. SLIC Superpixels Compared to State-of-the-Art Superpixel Methods. *ITPAM*. 34:2274-2281, doi: 10.1109/Tpami.2012.120.

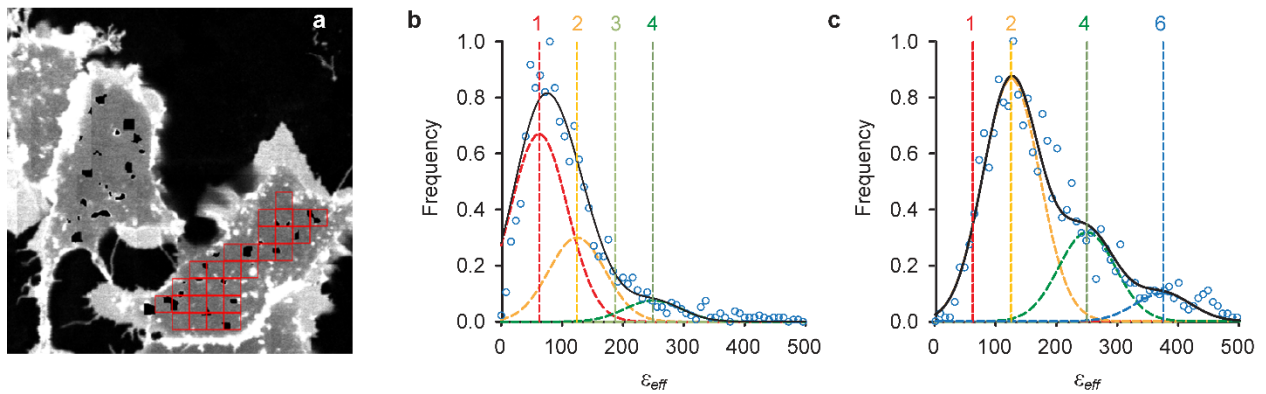

FIGURE S1 Calculation of monomeric brightness using de-punctate fluorescence images of brightness standards. De-punctate fluorescence images were obtained from cells expressing PM1-mEGFP and PM2-mEGFP anchored to the membrane. The calculation of the monomeric brightness was performed on these images (a-c) after puncta have been removed. (a) Example of two photon excitation scanning microscope image of basolateral membrane after puncta are removed is shown with segment boundaries superimposed (red squares). Brightness histograms assembled from de-punctate fluorescence images of cells expressing PM1-mEGFP (b) and PM2-mEGFP (c) were simultaneously fitted with a sum of four Gaussians. The PM1 samples were fitted with Gaussians representing monomer, dimer, trimer and tetramer (mean positions are indicated with the vertical dashed lines), The PM2 samples were fitted with Gaussians representing monomer, dimer tetramer and hexamer. The monomeric brightness found for the analysis performed on images with high intensity puncta removed was  $\epsilon_{eff}^{mono} = 62.3 \pm 46.5$ .

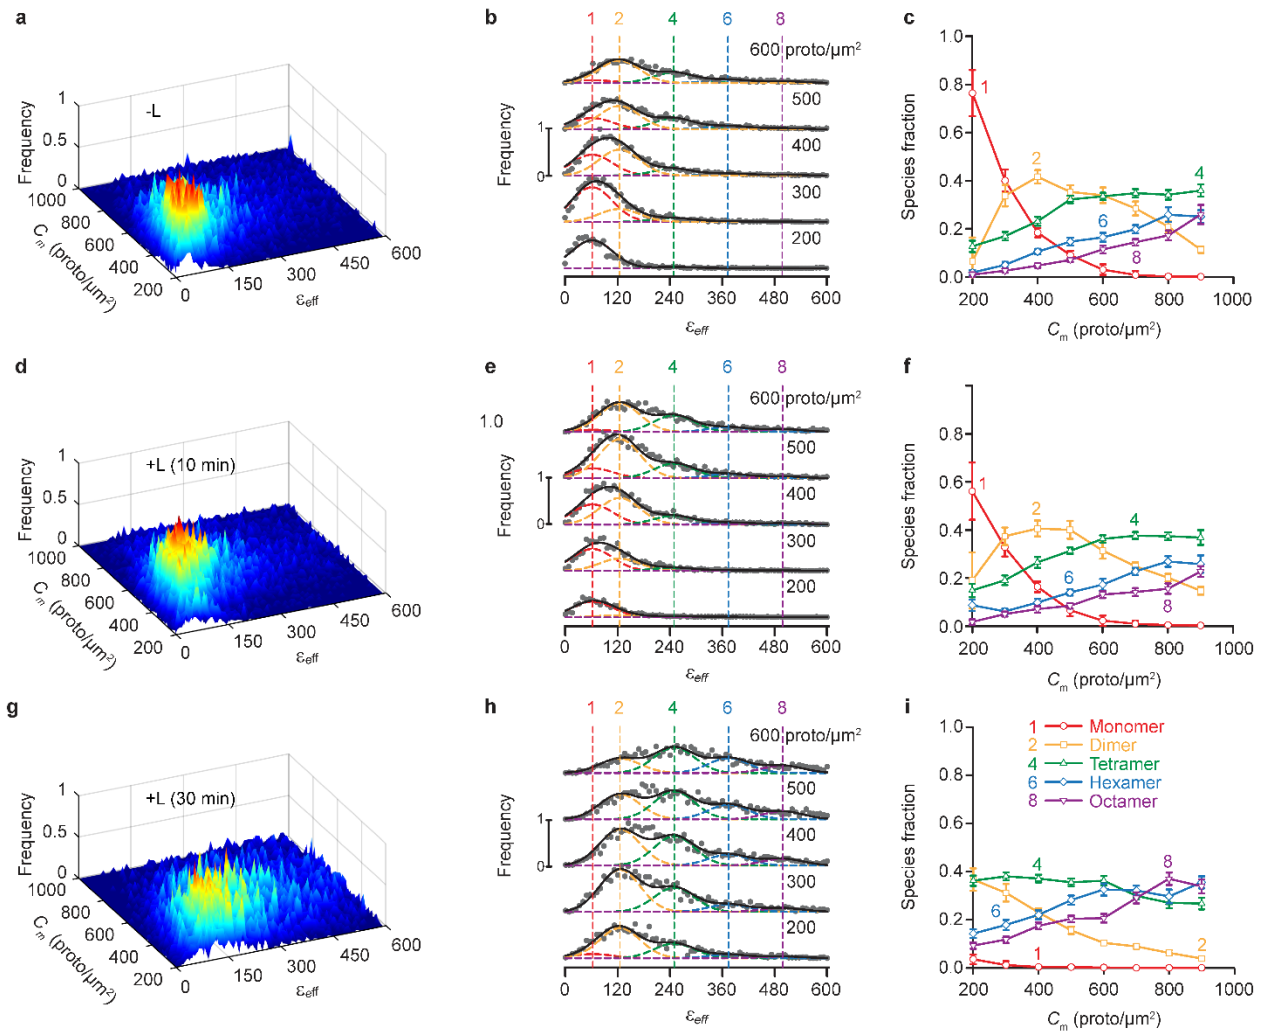

FIGURE S2 2D-FIF spectrometry applied to fluorescence images with puncta included (whole membrane analysis). Analysis was performed on the same fluorescence images which were used to obtain the results shown in Fig. 2. (a, d, g) Surface plots of the  $\epsilon_{eff}$  occurrence frequency vs concentration of protomers using 13,393 (a), 15,288 (d) and 12,964 (g) total segments (with each segment having maximum area of  $22 \times 22$  pixels). (b, e, h), Stacks of cross-sections through the surface plots in (a), (d), and (g), respectively, average concentration for each range (in protomers  $\times \mu\text{m}^{-2}$ ) is indicated above each curve. The vertical dashed lines indicate the peak positions for the brightness spectra of monomers ( $\epsilon_{eff}^{mono} = 62.3$ ), dimers and so on, obtained from the simultaneous fitting of the PM-1- and PM-2-mEGFP spectrograms used as standards of brightness (supplementary Fig. S1). (c, f, i) Relative concentration of protomers in each oligomeric species versus total concentration of protomers, as derived from fitting of the curves in (b), (e), and (h), respectively, with a sum of different Gaussian components representing different oligomeric species. Each data point and its error bar represent the mean  $\pm$  s.d., respectively, of 900 different species fraction values, obtained using the bootstrapping procedure described in the Methods section.

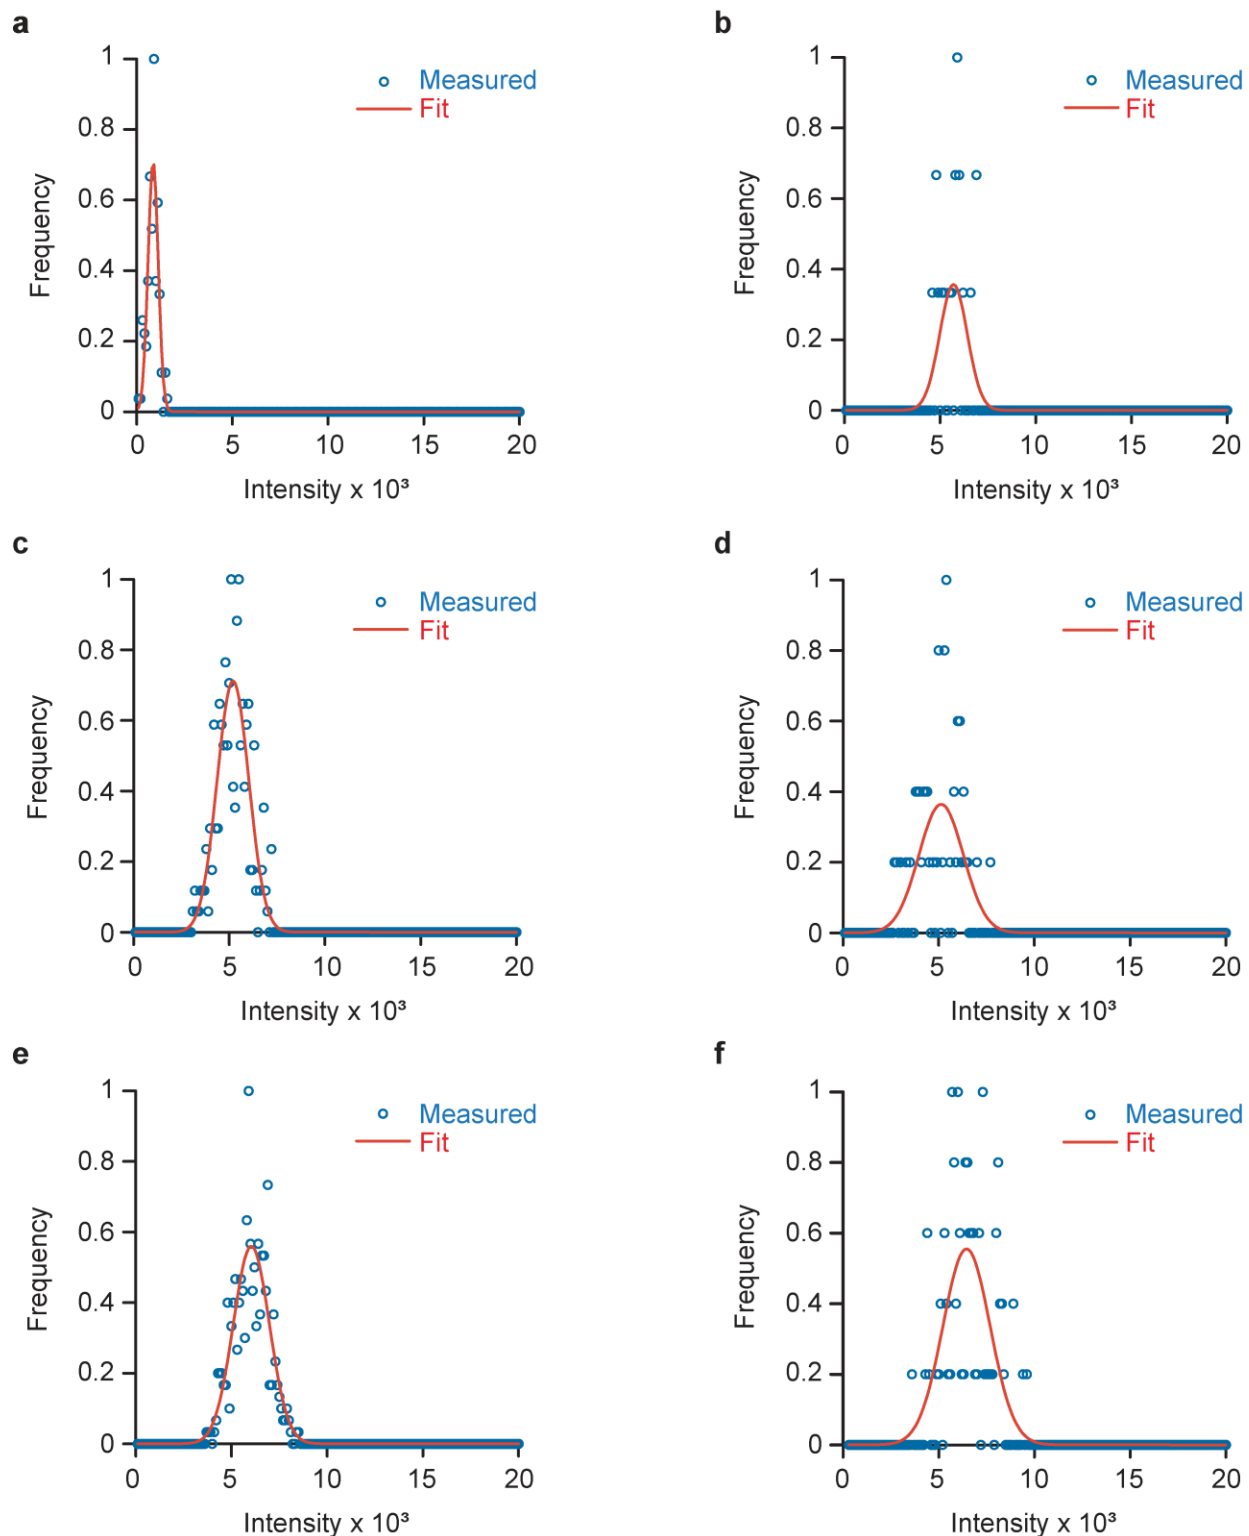

FIGURE S3 Comparison of typical intensity distributions, fitted with a single Gaussian curve, obtained from clustered puncta and individual punctum. (a-f), Measured intensity distributions (blue circles) were fitted with a single Gaussian function (red solid line) for three typical clustered puncta (a, c, e) and three typical individual punctum (b, d, f). The clustered puncta areas are 131 pixels (a), 253 pixels (c), and 392 pixels (e). The punctum areas are 19 pixels (b), 50 pixels (d), and 86 pixels (f).

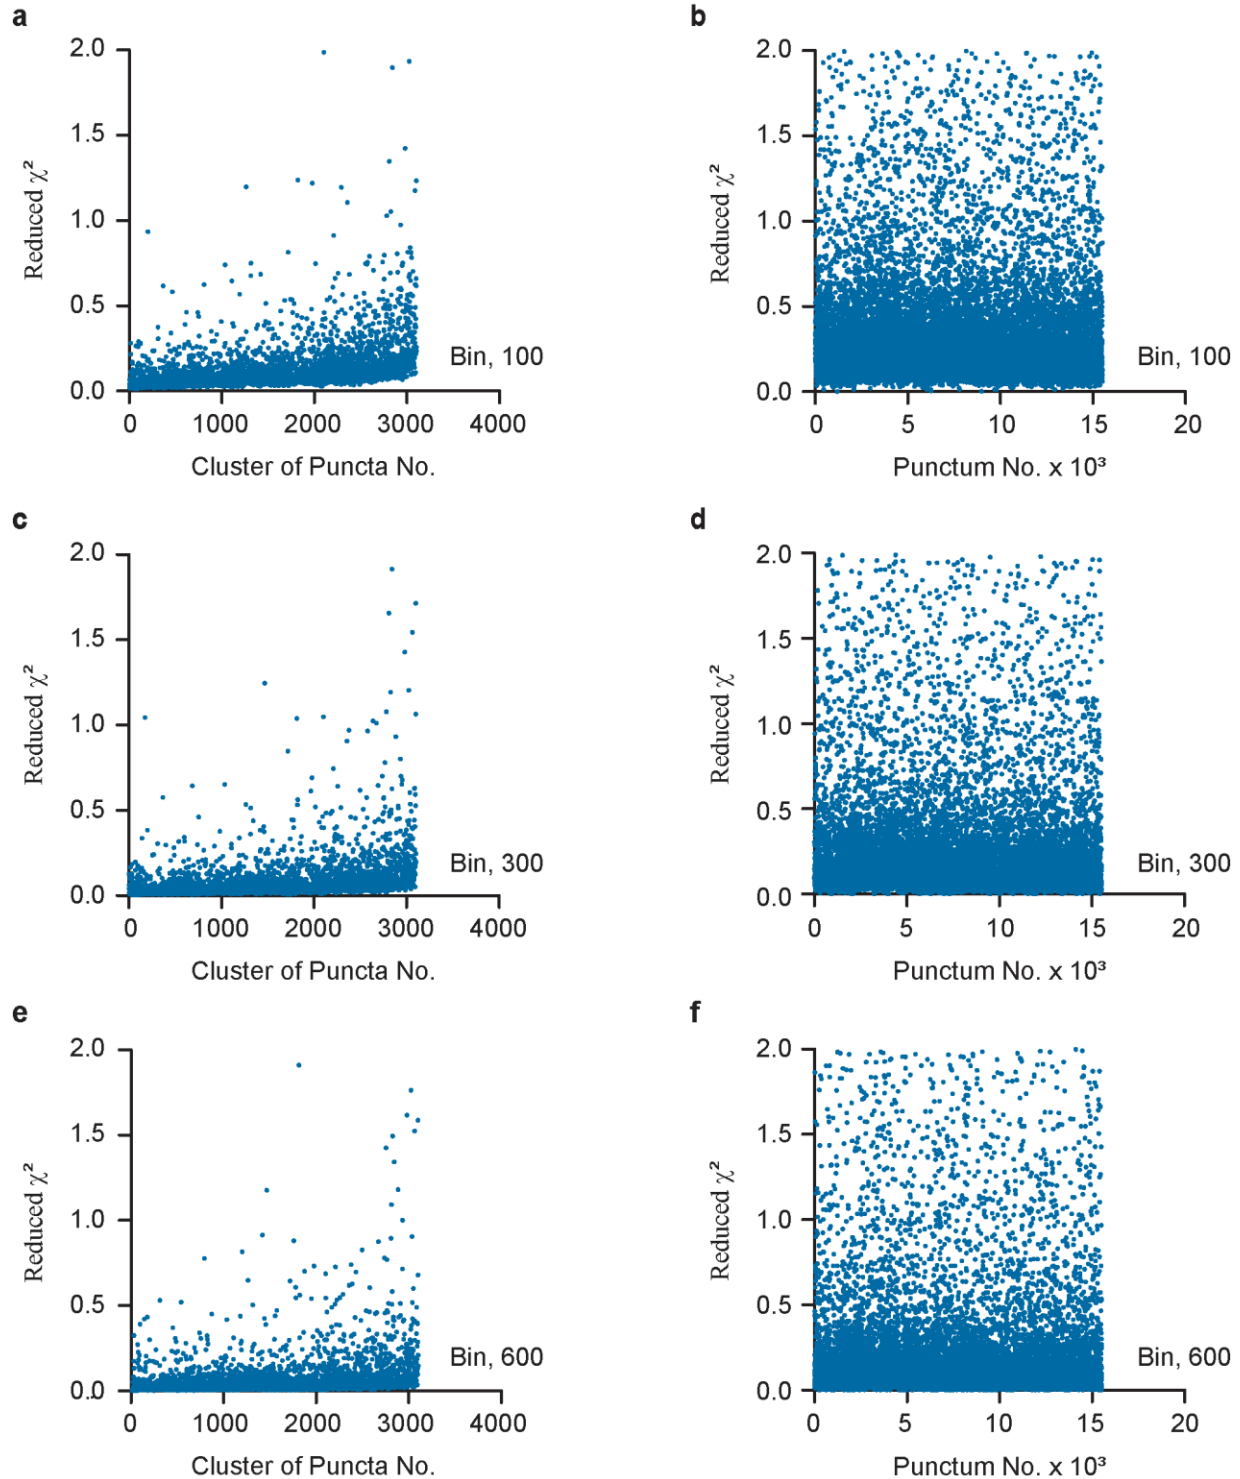

FIGURE S4 Reduced  $\chi^2$  calculated for the fitting of a single Gaussian curve to a cluster of puncta or individual punctum intensity distribution for different intensity bins. Scatter plot of reduced  $\chi^2$  versus (a, c, e) clusters of puncta number and (b, d, f) punctum number. Each point in the scatter plots represents the reduced  $\chi^2$  value obtained by fitting a Gaussian to a single intensity distribution generated from the pixel level intensities within either a cluster of puncta or a punctum. Reduced  $\chi^2$  is calculated using Eq. 1. The intensity distributions were generated using different intensity bin sizes of (a, b) 100, (c, d) 300, and (e, f) 600. The results were obtained from the untreated sample of cells expressing WT-Secretin receptors attached to mEGFP.

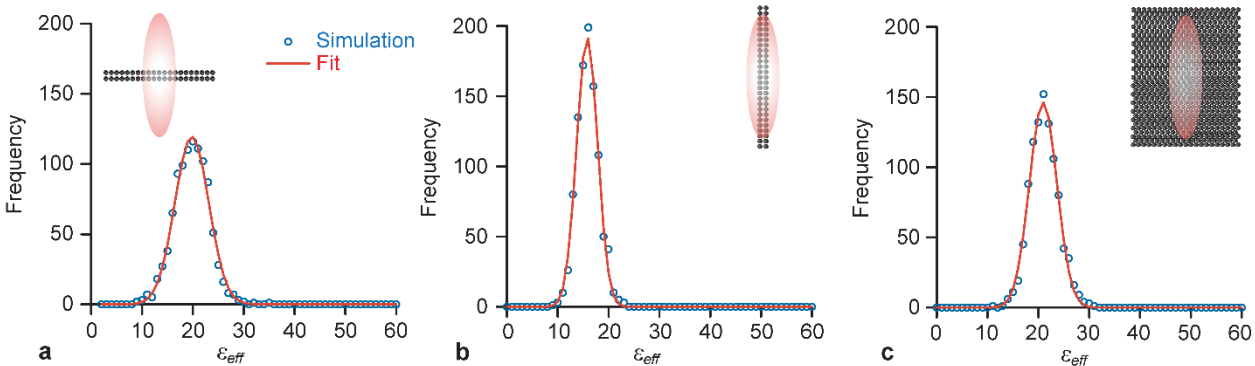

FIGURE S5 Results of the Monte-Carlo simulations of monomeric molecules placed randomly on a lattice and illuminated with a Lorentzian-Gaussian beam for different illumination and analysis scenarios. Brightness histogram of the monomeric molecules embedded in a plane perpendicular (a) or parallel (b, c) to the optical axis analyzed with the assumption of perpendicular (a, b) or parallel (c) illumination. The simulated data in (b) were therefore calculated using an incorrect  $\gamma$  value, which explains the shift in the brightness histogram to values lower than the brightness value of 20 used for the monomers in the simulation. Number of segments simulated was 1000 and each segment contained 500 pixels. For simplicity, the segment brightness was calculated as the  $Var(I_{seg})/\langle I_{seg} \rangle$ . Insets in a-c represent a sketch of the PSF of the laser beam (red oval shape) exciting the membrane (black rectangle) oriented perpendicular or parallel to the beam propagation axis ( $z$  axis).



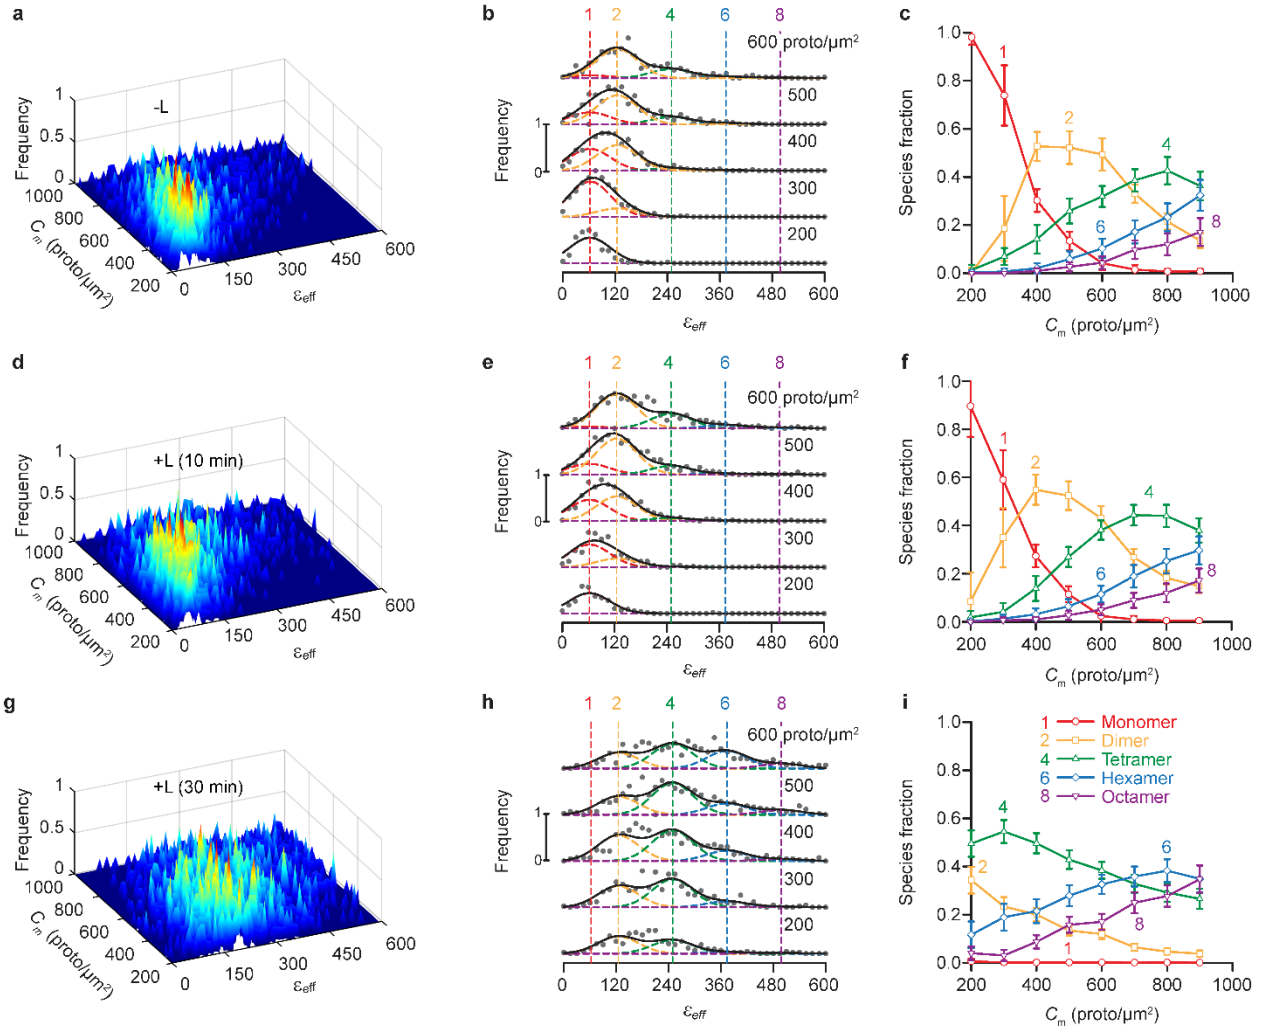

FIGURE S6 Results of the reanalysis of the data in Fig. 3 using a different  $\gamma$  factor as well as different PSF area factor in the calculation of  $C$ . The analysis was performed on the same extracted puncta from the same images as in Fig. 3. (a, d, g), Surface plots of the  $\varepsilon_{eff}$  occurrence frequency vs. receptor concentration of protomers using (a) 3,103, (d) 3,677, and (g) 3,704 total puncta clusters. (b, e, h), Stacks of cross-sections taken from the surface plots in (a), (d), and (g), respectively. Average receptor concentration for each range (in protomers  $\times \mu\text{m}^{-2}$ ) is indicated above each curve (see explanation in Fig. 2). The vertical dashed lines indicate the peak positions for the brightness spectra of monomers ( $\varepsilon_{eff}^{mono} = 62.3$ ), dimers and so on (see Methods section). The monomeric brightness was extracted from the de-punctate areas of the monomer and tandem-dimer standard samples (c, f, i), Relative receptor concentration of protomers in each oligomeric species versus total receptor concentration of protomers, as derived from fitting of the curves in (b), (e), and (h), respectively, with a sum of different Gaussian components representing different oligomeric species. Each data point and its error bar represent the mean  $\pm$  S.D., respectively, of 900 different relative fraction values, obtained from the statistical “bootstrapping” procedure mentioned in Fig. 2.  $\gamma$  equals 0.4423 (for Fig. 3,  $\gamma$  is 0.5) and the PSF area factor equals 0.173 (for Fig. 3 the PSF area factor is 0.1445).
